# 1 A Computational Framework to Study the Primary Lifecycle

## 2 Metabolism of *Arabidopsis thaliana*

3  
4 **Running title:** A Lifecycle Metabolic Modeling Framework

5  
6 **Authors:** Wheaton L. Schroeder<sup>1</sup> and Rajib Saha<sup>□\*</sup>

7 <sup>1</sup>Department of Chemical and Biomolecular Engineering, University of Nebraska – Lincoln,  
8 USA

9  
10 **Correspondence:**

11 Dr. Rajib Saha

12 rsaha2@unl.edu

13  
14 **Keywords:** stoichiometric model, *Arabidopsis thaliana*, metabolism, core metabolism, carbon  
15 metabolism, lifecycle, multi-tissue

16 **Language Style:** American English

17 **Article Type:** Research Article

18 **Article Length:** 9539 words (excluding abstract, summary, references, captions)

19 **Number of Figures:** 5

20 **Number of Tables:** 1

21

22 **Abstract**

23 Stoichiometric Models of metabolism have proven valuable tools for increased understanding of  
24 metabolism and accuracy of synthetic biology interventions to achieve desirable phenotypes.  
25 Such models have been used in conjunction with optimization-based and have provided  
26 “snapshot” views of organism metabolism at specific stages of growth, generally at exponential  
27 growth. This approach has limitations in that metabolic history of the modeled system cannot be  
28 studied. The inability to study the complete metabolic history has limited stoichiometric  
29 metabolic modeling only to the static investigations of an inherently dynamic process. In this  
30 work, we have sought to address this limitation by introducing an optimization-based  
31 computational framework and applying to a stoichiometric model of the model plant *Arabidopsis*  
32 *thaliana* of four linked sub-models of leaf, root, seed, and stem tissues which models the core  
33 carbon metabolism through the lifecycle of arabidopsis (named as p-ath780). Uniquely, this  
34 framework and model considers diurnal metabolism, changes in tissue mass, carbohydrate  
35 storage, and loss of plant mass to senescence and seed dispersal. p-ath780 provide “snapshots” of  
36 core-carbon metabolism at one hour intervals of growth, in order to show the evolution of  
37 metabolism and whole-plant growth across the lifecycle of a single representative plant. Further,  
38 it can simulate important growth stages including seed germination, leaf development, flower  
39 production, and silique ripening. The computational framework has shown broad agreement with  
40 published experimental data in tissue mass yield, maintenance cost, senescence cost, and whole-  
41 plant growth checkpoints. Having focused on core-carbon metabolism, it serves as a scaffold for  
42 lifecycle models of other plant systems, to further increase the sophistication of *in silico*  
43 metabolic modeling, and to increase the range of hypotheses which can be investigated *in silico*.

44 As an example, we have investigated the effect of alternate growth objectives on this plant over  
45 the lifecycle.

46

#### 47 **Author Summary**

48 In an attempt to study the evolution of metabolism across the lifecycle of plants, in this work we  
49 have created an optimization-based framework for the *in silico* modeling of plant metabolism  
50 across the lifecycle of a model plant. We then applied this framework to four core-carbon tissue-  
51 level (namely, leaf, root, seed, and stem) stoichiometric models of the model plant species  
52 *Arabidopsis thaliana*, and further informed this framework with a wide array of published *in vivo*  
53 data to increase model and framework accuracy. Unique to the p-ath780 model, compared to  
54 other models of plant metabolism, is the simultaneous considerations of diurnal metabolism,  
55 carbohydrate storage, changes in tissue mass (including losses), and changes in metabolism with  
56 respect to plant growth stage. This provides a more complete picture of plant metabolism and  
57 allows for a wider array of future studies of plant metabolism, particularly since we have only  
58 modeled the core carbon metabolism of *A. thaliana*, allowing this work to serve as a framework  
59 for studies of other plant systems.

## 60 **Introduction**

61 The use of synthetic biology for the engineering of uni- and multi-cellular organisms to enhance  
62 desirable phenotypes in microbe, plant, and animal systems, has been well established and has  
63 been capable of affecting the lives of millions of individuals, such as in the case of artemisinin  
64 production in yeast or enhancing nutritional value of agricultural products [1-2]. Synthetic  
65 biology techniques have been applied to many plant systems such as tomatoes [3], rice [4], and  
66 maize [5] to produce enhanced phenotypes often with application to human nutrition [2], pest  
67 resistance [5], and resilience to abiotic stresses [6]. Many of these efforts have focused on a  
68 genetic understanding and manipulation of the plant system (or plant tissue) in question, having  
69 relied on intuitive interventions such as changes in regulation, insertion of new gene(s), and  
70 deletion of gene(s) from competing pathway(s) [2,5,6]. Alternatively, computation-based  
71 systems biology approaches, such as the use of stoichiometric genome-scale models (GSMs) of  
72 metabolism, have predicted non-intuitive genetic interventions [7] by accounting for Gene-  
73 Protein-Reaction (GPR) links and understanding how a gene knockout, or a change in gene  
74 regulation, affects the entire system through tools such as Flux Balance Analysis (FBA) [8],  
75 OptKnock [9], and OptForce [10]. Other tools are built upon previously existing tools, such as  
76 dynamic FBA (dFBA), which performs FBA over windows of time by solving a non-dynamic  
77 linear or a static linear problem, both of which integrate system variables over discrete time  
78 windows to solve to metabolite concentration, in addition to reaction flux [11]. Such tools have  
79 led to enhanced mechanistic understanding for exploring the system-wide effects of synthetic  
80 biology interventions especially in a microbial or a fungal system, such as *E. coli* [10],  
81 cyanobacteria [12], and yeast [13].

82

83 Stoichiometric global plant models, which treat the metabolism of the plant as a single unit, have  
84 been developed for *Arabidopsis thaliana* (hereafter arabidopsis) [14-17], *Zea mays* (maize) [18],  
85 *Sorghum bicolor* (sorghum) [19], *Saccharum officinarum* (sugarcane) [19], *Brassica napus*  
86 (rapeseed) [19], and *Oryza sativa* (rice) [20]. These models have sought to analyze metabolic  
87 maintenance, response to abiotic stimuli, enzyme regulation changes, and metabolism as a whole  
88 at steady state (or pseudo-steady state). In addition, tissue-specific single-unit models have been  
89 reconstructed for various arabidopsis tissues [21], a maize leaf [22], and a barley seed [23] to  
90 better understand how present metabolites, metabolic pathways, and nutrient availability differ  
91 between tissues. Multi-tissue models have been created to characterize whole-plant metabolism  
92 for arabidopsis [16] and barley [17] and subsequently to study whole-plant metabolic response to  
93 the diurnal cycle and the source-to-sink relationship of leaves and seeds [16,17]. These studies  
94 either have considered metabolism at a single point [14,15,18-20], having taken a metabolic  
95 “snapshot” of a single point in growth time (often in the exponential growth phase) or have  
96 considered a single diurnal cycle [16]. This approach has been inherently limited in that  
97 metabolism is a dynamic and cumulative process. To clarify, metabolic state is dependent on  
98 both on external factors, such as availability of light, carbon sources, and availability of  
99 micronutrients, which these “snapshots” have captured, but also are dependent on metabolic  
100 history. These limitations have been inconsequential for single-cell systems in that laboratory  
101 apparatuses have held single-cell cultures at an exponential growth state; therefore, the  
102 “snapshot” approach has given good approximation of metabolism in these steady-state systems.  
103 In contrast, multi-cellular organisms, such as plants, will have passed through multiple and  
104 distinct stages of growth throughout its lifecycle [24], and the organism cannot be held at a  
105 steady state growth point. For this study, we have chosen *Arabidopsis thaliana* as the multi-

106 cellular organism for several reasons. Firstly, since the advent of modern genetics, arabidopsis  
107 has served as a model plant species in that it has a small genome; therefore, arabidopsis has been  
108 well studied. Secondly, arabidopsis has a limited number of basic tissues which will have  
109 required the construction of a tissue-level model. Thirdly, arabidopsis has at least two distinct  
110 metabolic modes dependent on the availability of light. When studying the effects of a synthetic  
111 biology intervention on a plant system, such as arabidopsis, understanding the evolution of  
112 metabolism throughout the plant lifecycle can increase understanding of the cumulative effect of  
113 a synthetic biology intervention. The multi-tissue Edinburgh forest model, which has made use  
114 of Ordinary Differential Equations (ODEs) rather than stoichiometric matrices, has modeled the  
115 lifecycle of a tree for the purposes of studying lumber yield [16,17]; however, the intent of the  
116 aforementioned model has not been to consider individual reactions or genetic interventions, and  
117 therefore the GPR links which are central to the sought understanding and testing hypotheses  
118 when using SMs have not been included.

119  
120 In this work, a core carbon stoichiometric metabolic model of arabidopsis has been reconstructed  
121 which consists of major primary carbon metabolism pathways, including, but not limited to,  
122 photosynthesis; the citrate cycle; starch and sucrose synthesis; fatty acid synthesis and  
123 degradation; and amino acid synthesis. The multi-tissue arabidopsis stoichiometric model,  
124 referred to as p-ath780 has 1033 total (and 633 unique) reactions (R), 1157 total (and 325  
125 unique) metabolites (M), and accounts for 780 genes (G) including 42 chloroplastic and 11  
126 mitochondrial genes. The model p-ath780 (plant-scale primary arabidopsis thaliana model  
127 including 780 genes) consists of four tissue-level models of metabolism: leaf (R: 537, M: 479,  
128 and G: 703), root (R: 130, M: 126, and G: 250), seed (R: 428, M: 411, and G: 529), and stem (R:

129 160, M: 140, and G: 250). The models are linked to one another and their respective environment  
130 by a comprehensive Flux Balance Analysis (FBA)-based [8] optimization framework [25] which  
131 considers both inter-tissue and environmental interactions. These four tissues have been chosen  
132 for model reconstruction to represent core plant functions. The root has been chosen and  
133 reconstructed for nutrient uptake and growth; the leaf for photosynthesis, carbon fixation, and as  
134 a source tissue for plant nutrition; the seed for metabolite storage and a sink tissue for metabolic  
135 investment; and the stem for metabolic transport and acting as a conduit for all metabolic  
136 interactions between other tissues. The dFBA method determines metabolite concentrations at  
137 the start and end points of the time frame [11], whereas the method developed does not focus on  
138 concentrations and considers multiple points within the time interval to make more accurate  
139 time-derivative estimates of steps in plant and tissue masses, as well as plant maintenance and  
140 senescence costs. The optimization framework of the p-ath780 model has taken a series of  
141 metabolic “snapshots” of arabidopsis metabolism throughout the lifecycle of a single  
142 representative plant subject to diurnal status, carbohydrate storage/uptake, changes in tissue mass  
143 (including losses), changes in relative tissues masses (due to growth stages), and changes in  
144 metabolism with respect to plant growth stage. p-ath780 has taken “snapshots” at hour intervals,  
145 and information from these snapshots have advanced plant and tissue masses forward one hour,  
146 when the next “snapshot” is taken. The series of “snapshots” produced by p-ath780 has given a  
147 framework for the investigation of the central metabolism of arabidopsis across its lifecycle.  
148 Several different objectives for this optimization-based framework have been investigated, with  
149 the default framework being the maximization of plant growth. Other alternative objectives  
150 investigated have included linear photonic efficiency and seed fatty acid production. This

151 framework with the default objective has shown general agreement with experimental data and is  
152 potentially useful as an initial framework for other plant systems.

## 153 **Results**

154 *Reconstruction of arabidopsis* primary carbon metabolism in tissue-specific models. Figure 1  
155 shows an overview of the workflow designed for determining the optimal reaction rates and mass  
156 step for each “snapshot” (top), how these “snapshots” have been advanced from one time point  
157 to the next; and how tissues have interacted at various stages of growth along with listing some  
158 important characteristics of a given growth stage that differs from other stages (bottom). In order  
159 to track the important metabolic interactions and transactions within and between major tissues  
160 of arabidopsis plant, namely seed, leaf, root, and stem, corresponding tissue-level metabolic  
161 models have been reconstructed. Model files for each tissue can be found in Supplemental Files  
162 1 (seed), 2 (leaf), 3 (root), and 4 (stem). Figure 2 shows a summary of the distribution of model  
163 reactions across KEGG-defined pathways of each tissue model and an overview of reasons for  
164 reaction inclusion through confidence scoring (see Method section) [26]. Figure 2(A)  
165 summarizes the pathways common to all tissues, Figure 2(B) summarizes the pathways common  
166 to seed and leaf tissues, and Figure 2(C-G) graphically summarize the sources of reactions in  
167 each tissue model and p-ath780 as a whole through confidence scores (see methods section) [26].  
168 First, the seed model has been reconstructed based on gene annotations and available MFA data  
169 [27] and then tissue model reactions have been distributed across five compartments based on  
170 literature evidence (see list of works cited in Supplemental File 5): extracellular space, cytosol,  
171 non-green plastid, inner mitochondria, and outer mitochondria. Next, transport and exchange  
172 reactions have been added to the model based on literature evidence (see list of works cited in  
173 Supplemental File 5) or modeling necessity to increase model connectivity [26]. The leaf model



174 has been reconstructed using common reactions and pathways from the seed model and having  
175 added new pathways and functions essential to the major functions of the leaf tissue, such as  
176 photosynthesis [18]. In addition to the five compartments in the seed model, the leaf model  
177 contains chloroplast and thylakoid compartments. Similarly, by having extracted common  
178 reactions/pathways from the seed model, the root and stem models have been reconstructed. The  
179 root and stem models have been focused primarily on nutrient uptake (root) and transport (root  
180 and stem). Both these models contain necessary transport/exchange reactions to ensure model  
181 connectivity and to facilitate their roles in transport processes. The stem and root models have all  
182 the subcellular compartments present in the seed model. Once initial reconstructions have been  
183 accomplished, thermodynamically infeasible cycles in addition to atom and charge imbalances  
184 have been resolved [26] and tissue-specific biomass equations based on literature information  
185 have been defined [18,27,28].

186

187 **Figure 1.** The design-build-test used cycle in constructing the p-ath780 model, where each box  
188 represents a step used in this cycle. The numbers in the lower left corner of each box indicates  
189 the approximate order in which these steps are undertaken for this cycle. This cycle is repeated  
190 until the *in silico* representation of *Arabidopsis thaliana* that is p-ath780 converges satisfactorily  
191 with *in vivo* experimental data as described in the results section.

192

193 **Figure 2.** A heuristic look at the four tissue models in terms of number of reactions in various  
194 KEGG-defined pathways which provides some clarity as to the metabolic functions of each  
195 model (A and B) and in terms of the sources of included model reactions, indicated by  
196 confidence scores (C through F). A) A bar graph showing tissue model reaction counts in  
197 KEGG-defined pathways (with the exceptions being the user defined pathways of exchange and

198 transport) common to most or all tissue (threshold: at least one model has at least three reactions  
199 in that pathway). B) Additional KEGG-defined pathways common to the seed and/or leaf model  
200 as these models contain more complete metabolism. C) - F) The source of each reaction included  
201 in the models through confidence scores for each tissue. G) The source of all reactions included  
202 in the p-ath780 model. See the methods section discussion related to confidence scores in this  
203 model.

204

205 *Development and tuning of the p-ath780 model.* Once these core tissue models have been  
206 reconstructed and curated, these have been linked within a comprehensive FBA-based  
207 optimization framework (provided in Supplemental File 6) for *in silico* representation of  
208 metabolic behavior across the arabidopsis lifecycle. This framework has next been applied to the  
209 p-ath780 model that includes all four tissue-specific models and has 1033 total reactions, 1157  
210 total metabolites, and 780 unique genes. Further details of the model development steps can be  
211 found in the methods section. The seed and leaf tissue have been selected to model an important  
212 source-to-sink relationship, whereas the stem and root tissues have been included to model  
213 nutrient transport and nutrient uptake in arabidopsis, respectively. The FBA-based framework  
214 has defined constraints related to tissue interactions and whole-plant growth heuristics based on  
215 experimental data, and also helped align *in silico* growth with experimentally determined *in vivo*  
216 growth through the modified design-build-test cycle shown in Figure 3, which will be discussed  
217 in greater detail later in this subsection.

218

219 **Figure 3.** A simplified workflow of the calculations made to estimate the plant mass step size  
220 taken from one “snapshot” to the next (large top box) and visual representation of how these

221 “snapshots” are strung together and grouped into stages and transitions (large bottom box). Each  
222 “snapshot” has been represented visually as small boxes containing initial time point, a figure  
223 highlighting major metabolic interactions, initial plant mass, step estimate, and cumulative  
224 relative growth rate. The contained figures show some major metabolic interactions across the  
225 plant system boundaries (full-headed arrows crossing the dashed system boundary) and indicates  
226 which tissues interact (single-headed arrows with circles to indicate a shared metabolic pool  
227 between the two tissues) for the given stage of growth which is indicated by the beveled box  
228 below the group of “snapshots”. The beveled boxes below a group of snapshots indicate the stage  
229 name (or transition name), the time points in growth which this stage encompasses, and some  
230 distinguishing characteristics of that stage.

231

232 The output of this framework has given metabolic “snapshots”, consisting of plant mass, growth  
233 rate, and flux rate of each reaction, at one-hour intervals across 61 days of growth, as the plant  
234 disperses all new seeds (through silique shattering) by 61 days after germination (DAG) [24].  
235 After 61 DAG the plant begins to desiccate, eventually resulting in plant death [24]. The p-  
236 ath780 model is not used to model plant metabolism after 61 DAG because no *in vivo* data has  
237 been found in literature concerning the metabolomics of plant death and desiccation. This  
238 optimization-based framework has allowed for the sampling of changes in central carbon  
239 metabolism at different stages in the arabidopsis lifecycle (see Figure 3). For all the following  
240 analyses, the objective of this framework at each point has been the maximization of the sum of  
241 all tissue biomass production rates, unless otherwise indicated.

242

243 In having determined the mass steps taken for each hour intervals, three FBA-like calculations at  
244 0,  $1/3$ , and  $2/3$  hours past the hour have been made to increase the accuracy of the derivative  
245 estimate by an explicit numerical integration method calculating the mass step at each hour  
246 interval using Heunn's rule for the third order Runge-Kutta method (see methods for greater  
247 detail). Figure 4 shows a more detailed workflow for each individual step in the form of a  
248 workflow diagram. Optimal flux points at every whole hour have been saved as the optimal flux  
249 rates at that growth point. To evaluate these balanced flux estimates, Flux Variability Analysis  
250 (FVA) [29] has been performed, at nine points, selected to represent each non-transition growth  
251 stage and diurnal status in those stages, subject to all growth constraints and a growth rate  
252 equivalent to the optimal growth rate (see methods for enumeration of these points).

253

254 **Figure 4.** The workflow diagram of the p-ath780 model, including inputs (orange), outputs  
255 (green), and internal workflow (blue). The inputs for the p-ath780 model include each individual  
256 tissue model, a file of growth specifications, and a list of point at which to take metabolic  
257 "snapshots". The internal workflow has read these inputs and then used them to construct model  
258 objects (bold, Times New Roman text) which are used to perform FBA, to solve for what the  
259 plant mass step is from the current to the next "snapshot", and to perform FVA. For each  
260 iteration, the time of the snapshot is stepped forward  $1/3$  step (hour), the FBA model object is  
261 solved, the mass step is calculated, and process is repeated. Every third iteration (e.g. where step  
262 = 3), Heun's method for a third order Runge-Kutta is used to estimate the plant mass step from  
263 the previous whole hour to the next whole hour and FVA is performed on the model at the  
264 previous whole hour using saved values. Once all iterations are complete (e.g. model is at final  
265 time point), then the output files are written.

266  
267 The simulations of the p-ath780 model has been advanced through several growth stages using  
268 time point for changes in growth stage taken from experimental data [24]. In the seed  
269 germination stage, uptake of fatty and amino acids from seed storage has been modeled as a  
270 constant rate of fatty acid usage which results in all stored fatty and amino acids being depleted  
271 by the end of the seed germination stage [30]. The 12 hours of light and 12 hours of dark diurnal  
272 rhythm has been chosen to match experimental conditions for studies on starch and sucrose  
273 storage/uptake dependence on the diurnal cycle [31]. These patterns have been fit to a sine wave  
274 model constraint with  $\pm 1\%$  tolerance. In growth stages when plant tissue ratios have been  
275 constant, the tissue mass ratio values had been taken from values typical for herbaceous plants  
276 [32].

277  
278 Returning to the design-build-test cycle used to improve the p-ath780 model, experimental data  
279 related to plant growth and plant growth stages have been collected from a variety of literature  
280 sources to serve as checks for the accuracy of the modeled system [24,33]. The first set of  
281 experimental data has included mass data, including whole plant and individual tissue. At  
282 approximately 17, 24, and 31 DAG the total dry plant mass should be between 0.5 and 2.0 mg; 2  
283 and 5 mg; and 10 and 30 mg, respectively [33]. Once the design-build-test cycle has been  
284 completed, the p-ath780 model has shown a total dry plant mass of 0.554 mg at 17 days (408  
285 hours), 3.74 mg at 24 days (576 hours), and 25.2 mg at 31 days (744 hours) after germination,  
286 demonstrating growth consistent with *in vivo* data. Furthermore, the relative growth rate for the  
287 first 31 days of plant growth has been reported as between 0.21 and 0.25 day<sup>-1</sup> [33], and the final  
288 p-ath780 has shown a relative growth rate of 0.246 over this time period. To adjust model

289 behavior in latter stages of growth, tissue-specific mass data has been obtained from literature.  
290 Specifically, the dry weight of the stem, the leaves, and the seeds has been reported as  
291 approximately 188 mg (standard deviation 39.3 mg), 163.7 mg (standard deviation 52.0 mg), and  
292 127.9 mg (standard deviation 52.7 mg), respectively [24]. As p-ath780 models both plant growth  
293 and loss of seed (and other) mass in the silique ripening stage, the peak mass of each of these  
294 tissues has been compared to this data. In the final p-ath780 model, the peak mass of the stem,  
295 leaves, and seeds has been determined as 189 mg, 177 mg, and 130, respectively, all of which are  
296 within one standard deviation of the experimental value (see the methods section for how tissue  
297 masses are determined). In summary, through the results of the design-build-test cycle  
298 implemented, *in silico* tissue and plant mass values are similar to *in vivo* data, thus showing  
299 strong agreement with respect to growth trends.

300

301 In early rounds of model reconstruction, it has been noticed that the plant model's photosynthesis  
302 is too efficient at fixing carbon. This is due to the fact that plants do not make full use of  
303 available light source(s), but the reconstructed metabolic model had been. Published *in vivo* data  
304 which has been used in the modeling and verification of p-ath780 made use of fluorescent lights,  
305 which have tight transmission spectra peaks at 544 and 609 nm [34]. In contrast, peak  
306 absorbance for plant leaves is at approximately 440 and 680 nm [35]. The problem of the  
307 availability of light has been addressed by scaling the transmission of the fluorescent lights by  
308 the absorbance of plant leaves. This has left approximately 21.06% of light transmitted by the  
309 fluorescent bulbs usable by the plant (see Supplemental File 5 and methods). An additional  
310 restriction, namely biomass yield, has also been placed on metabolic efficiency in plant systems.  
311 Biomass yield has been defined as the carbon fraction of biomass produced appearing in new

312 growth for each unit of carbon used for growth [36]. This yield value accounts for repair of  
313 existing biomass and replacement of lost biomass. Experimentally, this value has been identified  
314 as generally between 0.7 and 0.85 [37]. Here, for p-ath780 mass values to align with  
315 experimental data, two separate mass yield vales have been set at 0.32 and 0.23 for when the  
316 plant system lacks and has seed tissue respectively. This represents an incongruity with  
317 experimental evidence, although this value is still in the same order of magnitude as  
318 experimental evidence. All files necessary for p-ath780 have been included with this work in  
319 Supplemental Files 7 through 16. The *in silico* results of the final p-ath780 model can be found  
320 in Supplemental File 17.

321

322 *In silico Plant Growth under Alternative Objective Functions.* A total of six different objective  
323 functions for p-ath780 have been investigated and a summary of that investigation has been  
324 shown in Table 1. In all cases, root and stem tissue objectives have been defined as biomass  
325 production, where the leaf and seed objective functions are varied. When any tissue has a non-  
326 biomass objective, that objective is weighted by some scaling factor (either  $\alpha$  for light-based  
327 objectives or  $\beta$  for fatty acid-based objectives) to ensure the new terms do not dominate or be  
328 insignificant compared to biomass (e.g. be an order or magnitude or more different) and to  
329 investigate the different effects of weight factors. The first row (green) of Table 1 contains the *in*  
330 *vivo* arabidopsis data which has been used as targets and verification of the p-ath780 model. The  
331 second row (blue) contains the *in silico* data from p-ath780 where the objective for all tissues is  
332 biomass production (default objective), and has summarized the findings of the preceding  
333 subsection. For the mathematical definition of this and other objective functions discussed here  
334 see the methods section. The next two objective functions presented (grey) we have considered

335 set the seed tissue-level objective as the maximization of fatty acid stored in the seed tissue at  
336 two different weight factor values ( $\beta$ ). At low  $\beta$  values, this causes a scavenging of carbon  
337 wasted in the plant metabolism which is then diverted to the seed fatty acid production without a  
338 change in plant growth. At high  $\beta$  values, this alternate seed objective results in stunted plant  
339 growth as carbon used elsewhere is diverted to the seed tissue. This alternate objective function  
340 has no effect when the plant does not have seed tissue present. Photonic efficiency for the leaf  
341 tissue has been attempted as an alternative objective function and results are reported in the next  
342 two grey rows; however, depending on the weight of the photonic efficiency parameter, the  
343 model is generally photophobic (no light has been uptaken) or grows as normal. In all  
344 photophobic growth cases, the plant mass of the model eventually becomes negative, leading to  
345 nonsense in later time points, thus the results of these  $\alpha$  values are not reported. No  $\alpha$  value has  
346 been identified which produced a result between these extremes (photophobic and normal  
347 growth), and these attempts are not included in this work. The full output of each reported result  
348 can be found in Supplemental File 17. The final objective function investigated (and reported in  
349 Table 1) is one which combined the leaf linear photonic efficiency objective and the seed fatty  
350 acid storage objective at a moderate weight value (values enumerated in Table 1). As with other  
351 linear photonic efficiency objectives, the amount of light uptaken by the plant is unaffected, and  
352 as with other investigations of the seed fatty acid objective, the plant growth is stunted when the  
353 seed tissue is present. In summary, the p-ath780 model is robust to small and moderate  
354 perturbations in the objective related to photonic efficiency, fails with large perturbations to  
355 photonic efficiency objectives, and results in continuously changeable growth levels to  
356 metabolite production objectives.

357



## 358 **Discussion**

359 In the current work, a multi-tissue core metabolism stoichiometric model, including leaf, root,  
360 seed, and stem tissues, of *Arabidopsis thaliana* has been reconstructed (Figure 3), and linked in  
361 an FBA-based optimization framework (Figure 1). This framework has been embedded in a  
362 workflow (Figure 1) which has simulated how plant metabolism evolves over time with respect  
363 to the presence or absence of light, the transition to different growth stages, and the gain or loss  
364 of tissues (such as seed). This model has incorporated a wide variety of data which has not been  
365 incorporated in other stoichiometric modeling efforts such as the effect of plant mass, the effect  
366 of tissue mass difference on tissue interactions, whole-plant growth heuristics such as yield, the  
367 availability of usable light, and biomass-based plant maintenance (as opposed to ATP-based).  
368 The tissue models taken together with these literature-based constraints has been named the p-  
369 ath780 model. The whole-plant growth characteristics of p-ath780 have shown general  
370 agreement with experimental data, particularly with respect to whole plant mass at certain  
371 growth milestones and lifecycle tissue yields.

372

373 The design-build-test cycle used to develop and tune p-ath780, shown in Figure 3, has been  
374 implemented. As a result, in the final p-ath780 model, *in silico* predictions compared well to *in*  
375 *vivo* data, particularly plant, leaf, seed, and stem masses, with the exception of biomass yield.  
376 The incongruity between *in vivo* and *in silico* biomass yield has likely resulted from the p-ath780  
377 model only having included primary carbon metabolism, which in turn means that plant biomass  
378 has been built entirely from generally less metabolically expensive primary metabolites. This had  
379 resulted in too efficient biomass production, hence the lower yield for the model. This  
380 discrepancy in biomass yield has served to highlight the large effect of secondary metabolism on

381 plant growth and has served as a correction factor on the model due to the lack of modeled  
382 secondary metabolism. In addition, likely the plant mass yield is lower when seed tissue is  
383 present because flower tissue is metabolically expensive yet is not modeled in this work. In  
384 additional, biomass drains for plant senescence and maintenance have been included [36,37].

385

386 Once the model has been developed, six different objective functions have been applied to it,  
387 including the default objective of maximizing plant growth, linear photonic efficiency, and seed  
388 fatty acid production. In summary, the p-ath780 model is robust to small and moderate  
389 perturbations in the objective related to photonic efficiency, breaks when large perturbations are  
390 made to the photonic efficiency objective, and is capable of some fine tuning with respect to  
391 metabolite production objectives. The behavior of p-ath780 with respect to the linear photonic  
392 efficiency objective function is due to multiple factors. First, as the partially photophobic case  
393 exists, this suggests that seed tissue is the most metabolically expensive tissue to create. This is  
394 as expected because the seed tissue requires storage of high-energy molecules such as fatty acids,  
395 proteins, and sugars to feed its embryo when dispersed. Further, the rate of biomass production  
396 for all tissues are linked in the optimization-based framework. Secondly, seed tissue has a target  
397 fraction of overall plant mass which it must grow to for each hour interval of the flower  
398 development stage. If seed tissue is too metabolically expensive to produce, relative to the cost to  
399 uptake more light, it appears that the solution strategy then becomes to decrease the mass of  
400 other tissues while leaving the growth of the seed tissue to be minimal. This can result in sharp  
401 changes in mass which falls outside the realm of stability for Heunn's third order Runge-Kutta  
402 rule, resulting in predictions with no biological relevance. Thirdly, biomass composition and  
403 metabolic cost is not dependent on the amount of light uptaken, so the biomass cost is constant

404 with respect to light uptake so there is no steady equilibrium between the two terms except at  
405 the extremes. Fourthly, minimizing light uptake and maximizing biomass growth as objectives  
406 are competitive, increase light uptake results in increased growth in stoichiometric models. In  
407 contrast, this is not an issue for maximizing fatty acid production as biomass partially consists of  
408 fatty acids, therefore these two objectives can be complimentary to some degree and a variety of  
409  $\beta$  values can be used without the model failing to find a solution. Theoretically, there exists some  
410 highly-specific value of  $\alpha$  at which the cost to the light needed to drive growth is balanced with  
411 the rate of production of new biomass, but this is an unsteady equilibrium which when the value  
412 of  $\alpha$  is slightly perturbed finds the new equilibrium at either extreme. Therefore, the value of  $\alpha$   
413 might be imagined as a fulcrum between the two terms as illustrated in Figure 5. Figure 5(A)  
414 restates the linear photonic efficiency objective equation, and Figure 5(A-D) represents the  
415 action of  $\alpha$  as a fulcrum. Figure 5(D) in particular illustrates why the p-ath780 model is robust to  
416 changes in the value of  $\alpha$  below this theoretical balance point.

417

418 **Figure 5.** This figure highlights how the weight factor,  $\alpha$ , fails to reach some kind of equilibrium  
419 between light uptake and biomass production in the linear photonic efficiency objective. A)  
420 Restates the linear photonic efficiency objective function. B) Shows the theoretical balance  
421 which might exist between light uptake and biomass production at some highly specific value of  
422  $\alpha$ . C) Shows how as slight increase in  $\alpha$  from that point causes light to outweigh biomass in  
423 terms of influence on the objective function value. This results in photophobic growth as light  
424 “outweighs” growth. D) Shows how as slight decrease in  $\alpha$  from that point causes light to  
425 outweigh biomass in terms of influence on the objective function value. This results in normal  
426 growth as growth “outweighs” light.

427

428 This work does not account for diurnal rhythms in the transcriptome of *Arabidopsis thaliana* for  
429 several reasons. Firstly, the majority of transcriptomic studies have focused on the regulatory  
430 network of proteins which regulate metabolism based on the availability of light and rhythm  
431 [43,44], rather than considering metabolic proteins which are represented in the p-ath780 model.  
432 Secondly, tissue-specific diurnal transcriptomic information is only available for the leaf tissue  
433 [43,44]. Further, these experiments generally consider a single point in the growth cycle of  
434 arabidopsis under specific growth conditions. The framework of p-ath780 is already highly  
435 constrained, and that the inclusion of too much data will invariably cause model failure. This is  
436 because *in vivo* experiments, in general and those used in this work, often occur under different  
437 conditions, at different points in the plant lifecycle, have different methods to some degree, or  
438 even seem quantitatively difference due to the noise inherent to biological systems, making  
439 alignment of quantitative *in vivo* data from too many sources impossible. In this work, we have  
440 decided to use data which described a wide range of time point in arabidopsis growth, such as  
441 biomass yield, relative growth rate, growth up to a certain time point, and overall tissue yield,  
442 rather than data which may be specific to a single point in growth, such as transcriptomics.

443

444 This work provides the basis for much future development and sophistication. For instance, the  
445 current p-ath780 model could be further sophisticated by adding the secondary metabolism of the  
446 plant system, which is a considerable resource drain in many plant systems. Further, at present  
447 several simplifications are made regarding tissues, particularly related to seed tissue. For  
448 instance, the model currently assumes that when the plant is flowering, that flower biomass and  
449 metabolism is roughly equivalent to that of the seed. While this resulted in a simpler model, this

450 model cannot be then used to investigate certain metabolic hypothesis such as the cost to the  
451 plant resulting from flower pigmentation, pollen, and nectar production. Future work will include  
452 producing models for other plant tissues, such as flowers. In addition, as this is a core carbon  
453 metabolism model, it is likely quite similar to the core metabolism of other plant systems;  
454 therefore, the p-ath780 model can serve as a basis for the development of lifecycle models for  
455 other plant systems, particularly annual eudicots which are of agricultural interest, such as rice  
456 (*Oryza sativa*), potatoes (*Solanum tuberosum*), tomatoes (*Solanum lycopersicum*), and soybeans  
457 (*Glycine max*).

458

## 459 **Methods**

460 *Overview of the reconstruction of core metabolic models of leaf, root, seed, and stem tissues.*

461 *The seed tissue model.* The general workflow which has been used for the development of the  
462 four core tissue models has been illustrated in Figure 3. We have developed the seed model first,  
463 with the central metabolic pathways based on a Metabolic Flux Analysis (MFA) of four seed  
464 genotypes published previously [27]. We have then manually filled gaps in this model with  
465 reactions based on literature and genomic evidence [26] or with reactions being necessary for  
466 ensuring model connectivity. The stoichiometric coefficients of biomass precursors have been  
467 determined using sink reactions, dry biomass weight composition, and amino acid mass ratios  
468 provided in a previous work [27] (see Supplemental File 22). The resultant seed tissue model has  
469 focused on storage, respiration, and growth, and consists of 428 reactions, 529 genes, and 411  
470 metabolites (included as Supplemental File 1).

471

472 *The leaf tissue model.* Next, we have reconstructed the leaf model by taking common  
473 reactions/pathways from the seed model and adding synthesis pathways for amino acids that are

474 not synthesized in the seed, in addition to photosynthesis, carbon fixation, gluconeogenesis, and  
475 transport reactions. We have then developed the biomass equation for the leaf tissue using that of  
476 a previously published Arabidopsis model [18] (see Supplemental File 22). The resultant leaf  
477 tissue model has focused on photosynthesis, respiration, gas exchange, fatty acid synthesis, and  
478 growth, and contains of 537 reactions, 703 genes, and 479 metabolites. We have included the  
479 leaf model with this work as Supplemental File 2.

480

481 *The root and stem tissue models.* We have constructed the root and stem models, similarly, by  
482 extracting common reactions/pathways from the seed model and adding necessary transport and  
483 exchange reactions. Then exchange reactions have been added to allow the root to be linked to  
484 micronutrient uptake processes from the soil, and the stem to be involved in inter-tissue transport  
485 processes. In the absence of Arabidopsis-specific estimates, the dry weight composition of  
486 switchgrass (*Panicum virgatum*) root and stem [28] have been assumed to be equivalent to the  
487 biomass composition of these tissues in Arabidopsis. Due to the low detail level of the dry  
488 weight composition analysis, the biomass of root and stem tissues have been composed entirely  
489 of carbohydrates. The resultant root tissue model has focused on nutrient uptake, transport, and  
490 growth, consisting of 130 reactions, 250 genes, and 126 metabolites, while the stem tissue model  
491 focuses on transport and growth, consisting of 160 reactions, 250 genes, and 140 metabolites.  
492 We have included the root and stem models with this work as Supplemental Files 3 and 4  
493 respectively.

494

495 *Confidence scoring.* Reaction confidence scores have been defined in a manner consistent with a  
496 previously published protocol [26]. Additional information on confidence scoring of the p-  
497 ath780 model can be found in Supplemental File 22.

498

499 *Curation of all these tissue models.* For all four models, we have balanced (both in terms of  
500 elements and charge) all model reactions and have resolved thermodynamically infeasible cycles  
501 by removing reactions, breaking composite reactions, and adding metabolic costs to transport  
502 reactions. For all these tissue models, GPR links have been established through a largely  
503 automated workflow utilizing the KEGG API for the majority of reactions using the code  
504 included in Supplemental File 18. This is followed by having manually curated the GPR links  
505 and/or inclusion rational of reactions with non-KEGG identifiers. The count of tissue model  
506 reactions present in KEGG-defined pathways is shown in Figure 2(A), showing pathways  
507 common to most all tissue models, and Figure 2(B), showing pathways common to seed and leaf  
508 tissues, these figures have been created using code included in Supplemental Files 19, 20, and  
509 21. The results of this automated workflow can be found in Supplemental File 5. Sources for  
510 reactions included in leaf, root, seed, and stem models are shown in Figure 2(C-F), respectively  
511 through confidence scoring (see confidence score section). Similarly, the confidence scores for  
512 all reactions in the p-ath780 model have been reported in Figure 2(G).

513

514 *Overview of the developed of the optimization-based framework of p-ath780.* The models have  
515 next been linked using well-known computational framework known for modeling microbial  
516 communities [25]. An objective function for each of these models has then been defined,  
517 specifying the maximization of the tissue-level biomass production rate followed by adding

518 constraints for simulating growth in light and dark conditions. Next, literature information  
519 including embryo mass [30], initial tissue masses [38], growth stages [24], time points at which  
520 growth stages occur [24], constraints to link tissue growth rates to appropriate tissue ratios,  
521 transpiration [33,39], leaf surface area [28], usability of provided light [31,34,35], and defining  
522 changes in tissue mass ratios [24,40] has been integrated into these models, which are typically  
523 overlooked in most other SMs. In this work, we have decided to simulate arabidopsis biomass  
524 across 61 days (1464 hours) of growth, as all plant seeds are dispersed by day 61, and after  
525 which *in vivo* data on plant growth and mass is sparse. More specific details can be found in the  
526 following sub-sections. The full optimization-based framework used in this work has been  
527 provided in Supplemental File 6, and further requires Supplemental Files 7 through 16.

528

529 *Generalized statement of the FBA-like optimization-based framework used.* The optimization-  
530 based framework used can be stated in general terms as follows. The FBA-based framework  
531 which determines the optimal rates of flux through each reactions can be stated as follows (using  
532 the default objective).

533

$$\text{maximize } Z = v_{leaf,biomass} + v_{root,biomass} + v_{stem,biomass} \quad (1)$$

Subject to

$$10 \geq \sum_{j \in J} S_{ij} v_j \geq 0 \quad \forall i \in I \quad (2)$$

$$\begin{aligned} M_{leaf} v_{CO_2,in,leaf} \\ \geq M_{root} v_{CO_2,out,root} + M_{seed} v_{CO_2,out,seed} \\ + M_{stem} v_{CO_2,out,stem} \text{ (when light available)} \end{aligned} \quad (3)$$



$$\begin{aligned}
 M_{leaf} v_{O_2, out, leaf} & \\
 & \geq M_{root} v_{O_2, in, root} + M_{seed} v_{O_2, in, seed} \\
 & + M_{stem} v_{O_2, in, stem} \text{ (when light available)}
 \end{aligned} \tag{4}$$

$$v_{m, in, root} \leq M \quad \forall m \in Micro \tag{5}$$

$$M_{root} v_{m, out, root} \leq M_{root} v_{m, in, root} \quad \forall m \in Micro \tag{6}$$

$$M_{root} v_{m, out, root} = M_{stem} v_{m, in, stem} \quad \forall m \in Micro \tag{7}$$

$$M_{stem} v_{m, out, stem} \leq M_{stem} v_{m, in, stem} \quad \forall m \in Micro \tag{8}$$

$$M_{stem} v_{m, out, stem} = M_{leaf} v_{m, in, leaf} + M_{seed} v_{m, in, seed} \quad \forall m \in Micro \tag{9}$$

$$M_{stem} v_{x, in, stem} = M_{leaf} v_{x, out, leaf} \quad \forall x \in X \tag{10}$$

$$M_{stem} v_{x, out, stem} = M_{stem} v_{x, in, stem} \quad \forall x \in X \tag{11}$$

$$M_{stem} v_{x, out, stem} = M_{seed} v_{x, in, seed} \quad \forall x \in X \tag{12}$$

$$M_{stem} v_{sucrose, in, stem} = M_{leaf} v_{sucrose, out, leaf} \tag{13}$$

$$M_{stem} v_{sucrose, out, stem} \leq M_{stem} v_{sucrose, in, stem} \tag{14}$$

$$M_{stem} v_{sucrose, out, stem} = M_{root} v_{sucrose, in, root} + M_{seed} v_{sucrose, in, seed} \tag{15}$$

$$v_{starch, store, leaf} = s_{la} \sin(s_{lf}(n + s_{lx})) \tag{16}$$

$$v_{starch, store, stem} = s_{sa1} \sin(s_{sf1}(n + s_{sx1})) \tag{17}$$

$$v_{sucrose, store, stem} = s_{sa2} \sin(s_{sf2}(n + s_{sx2})) \tag{18}$$

$$v_{water, in, root} \leq M \tag{19}$$

$$M_{root} v_{water, out, root} = M_{stem} v_{water, in, stem} \tag{20}$$

$$M_{stem} v_{water, out, stem} = M_{leaf} v_{water, in, leaf} + M_{seed} v_{water, in, seed} \tag{21}$$

$$v_{water, in, leaf} = t_{leaf} \text{ (when light available)} \tag{22}$$

$$v_{root,biomass} = \ln(\mu) + v_{leaf,biomass} \quad (23)$$

$$\mu = \frac{x_{root}M_{leaf}}{x_{leaf}M_{root}} \quad (24)$$

$$v_{seed,biomass} = \begin{cases} 0 & M_{seed} = 0, s = 0 \\ \ln(\theta) + v_{leaf,biomass} & M_{seed} \neq 0, s \neq 0 \\ -v_{leaf,biomass} & M_{seed} \neq 0, s = 0 \\ v_{leaf,biomass} & M_{seed} = 0, s \neq 0 \end{cases} \quad (25)$$

$$\mu\theta = \frac{x_{seed}M_{leaf}}{x_{leaf}M_{seed}} \quad (26)$$

$$v_{stem,biomass} = \ln(\lambda) + v_{leaf,biomass} \quad (27)$$

$$\lambda = \frac{x_{stem}M_{leaf}}{x_{leaf}M_{stem}} \quad (28)$$

$$v_{seed,biomass\ loss} = \begin{cases} -v_{seed,biomass} & n \geq n_{flowering} \quad n \geq n_{seed\ loss} \\ 0 & n \leq n_{seed\ loss} \end{cases} \quad (29)$$

$$v_{scen} = \left(\frac{k_m + k_s}{24}\right)M_{tissue} \quad (30)$$

534

535 Where  $I$  is the set of metabolites;  $J$  is the set of reactions;  $Micro$  is the set of micronutrients  
 536 (phosphate, ammonium, and sulfate) and is a subset of  $I$ ;  $X$  is the set of amino acids which are  
 537 synthesized in the leaf tissue and exported to other tissues; and  $Y$  is the set of sugars stored by  
 538 various plant tissues. In addition,  $M$  is defined as a very large number,  $t_{leaf}$  is the mass-  
 539 normalized transpiration rate from the leaf;  $s_{la}$ ,  $s_{sa1}$ , and  $s_{sa2}$  are the amplitudes of the sine wave  
 540 modeling of starch storage in the leaf and stem and sucrose storage in the stem, respectively;  $s_{lf}$ ,  
 541  $s_{sf1}$ ,  $s_{sf2}$  are the frequencies of the sine wave modeling of starch storage in the leaf and stem and  
 542 sucrose storage in the stem, respectively;  $s_{lx}$ ,  $s_{sx1}$ , and  $s_{sx2}$  are the x-intercept shifts of the sine  
 543 wave modeling of starch storage in the leaf and stem and sucrose storage in the stem,  
 544 respectively;  $s$  is the level of seeding of the model;  $x_{tissue}$  is the fraction of total plant mass

545 accounted for by that tissue; and  $M_{tissue}$  is the mass of the given tissue. The following subsections  
546 will explain the constraints used in the FBA framework.

547

548 *Defining model objective functions.* For most analyses and results, the objective function of p-  
549 ath780 has been to maximize the sum of the biomass production rates for all four tissues  
550 according to the following equation (referred to as the default objective).

551

$$\text{maximize } z = v_{growth\ leaf} + v_{growth\ root} + v_{growth\ seed} + v_{growth\ stem} \quad (31)$$

552

553 Where  $z$  has been defined the objective function and  $v_{growth\ tissue}$  is defined as the rate of  
554 biomass production, in units of  $h^{-1}$ , of the tissue referenced. This objective function is  
555 approximately equivalent to having maximized the growth rate (change in mass per unit time) of  
556 the plant as a whole. This objective function has led to one major issue, namely how to avoid the  
557 model producing only the metabolically “cheapest” tissue which could result in the maximum  
558 objective value but is biologically unrealistic. This is addressed by equations (23) through (28)  
559 and will be further discussed later.

560

561 It has been noted that the maximization of plant biomass has not been the only feasible objective  
562 function for plant SM system, for instance one alternate objective function is the maximization  
563 of plant photonic efficiency [15,16]. This objective has generally been framed as minimizing the  
564 amount of light used by the plant system, given a required growth rate [15,16]. As it has been  
565 assumed that the only (significant) photosynthetic tissue in the p-ath780 model is the leaf tissue,

566 only the objective with relation to the leaf tissue has been altered. As a result, the leaf tissue term  
567 in equation (1) has been replaced with a photonic efficiency term in the following equation.

568

$$\text{maximize } z = -\alpha(v_{\text{photon uptake}}) + v_{\text{growth root}} + v_{\text{growth seed}} + v_{\text{growth stem}} \quad (32)$$

569

570 Where  $\alpha$  has been defined a correction factor to scale  $v_{\text{photon uptake}}$  to be on the same order of  
571 magnitude as the growth rates for each other tissue.

572

573 An alternative objective function has also been defined for the seed tissue. Specifically, as fatty  
574 acids have been shown to one of the most prominent forms of carbon storage in the seed tissue  
575 [38], the alternate objective function is the maximization of seed fatty acid stores. This has  
576 resulted in seed objective function as follows:

577

$$\text{maximize } z = v_{\text{growth root}} + v_{\text{growth root}} + \beta \sum v_{\text{FA sinks}} + v_{\text{growth stem}} \quad (33)$$

578

579 Where the new seed flux term is defined as the sum of fatty acid storing (sink) reactions and  $\beta$   
580 serves to reduce this term to be equal in order of magnitude to the other objectives. Similar to  $\alpha$ ,  
581  $\beta$  has been determined through trial and error. One additional objective function has been studied  
582 which combines linear photonic efficiency and fatty acid storage:

583

$$\text{maximize } z = -\alpha(v_{\text{photon uptake}}) + v_{\text{growth root}} + \beta \sum v_{\text{FA sinks}} + v_{\text{growth stem}} \quad (34)$$

584

585 Equation (33) has combined three separate objective types: linear photonic efficiency (leaf),  
586 biomass production (root and stem), and fatty acid storage (seed). It should be noted that the  
587 objective for the root and stem tissues are always to maximize biomass production. For more  
588 details see Supplemental File 22.

589

590 *Mass balance.* In this model, the mass balance, equation (2), is allowed some flexibility for the  
591 storage of metabolites in the plant tissue up to 10 mmol per gDW hour. This has been found to  
592 be necessary in the design-build-test cycle so that all points would be feasible.

593

594 *Enforcing net CO<sub>2</sub> consumption O<sub>2</sub> production.* In equations (3) and (4), it is required that the net  
595 effect plant metabolism is carbon fixation and oxygen production, since this is a well-known role  
596 of plant systems (see Supplemental File 22).

597

598 *Enforcing logical flow of micronutrients.* In equations (5) through (9) the logical flow of  
599 micronutrients is dictated. Equation (5) ensures that the uptake rate is bounded, equation (6)  
600 ensures that the rate of each micronutrient exported by the root to the other tissues is less than or  
601 equal to that uptaken by the root from the soil, allowing for the root to use a portion of the uptake  
602 nutrients. Equation (7) ensures that all micronutrient exported by the root is uptaken by the stem,  
603 and equation (8) is essentially the same as equation (6), but for the stem tissue. Finally, equation  
604 (9) ensures that the micronutrients exported by the stem are all given to other tissues, specifically  
605 leaf or seed. Both sides of the equation in equations (6) through (9) are multiplied by each tissues  
606 mass to convert the units of the constraint from mmol per gDW hour to mmol per hour as each  
607 tissue has a different mass value in gDW. For more details see Supplemental File 22.

608

609 *Enforcing logical flow of amino acids.* Similar to micronutrients, the logical flow of amino acids  
610 has been defined explicitly via equations (10) to (12), as having been synthesized in the leaf  
611 tissue and exported to seed tissue. This is because seed tissue has not been shown to produce all  
612 needed amino acids in the MFA study consulted [27], and the root and stem models do not  
613 require amino acids for biomass production in the defined biomass composition. Essentially,  
614 these constraints ensure that all amino acids exported by the leaf are uptaken by the stem  
615 [equation (6)]; that these amino acids are not stored in the stem [equation (7)]; and that all amino  
616 acids are exported by the stem to the seed tissue. For more details see Supplemental File 22.

617

618 *Enforcing logical flow of sucrose.* As with amino acids, sucrose is modeled as being produced in  
619 the leaf tissue and exported to other tissues. In contrast to amino acids, sucrose is necessary for  
620 all tissue models. Therefore, equation (13) is analogous to equation (10), equation (14) allows  
621 the stem to use the sucrose it receives from the leaf, unlike equation (11), and equation (15)  
622 exports sucrose both to the seed and root, unlike equation (12). For more details see  
623 Supplemental File 22.

624

625 *Enforcing diurnal patterns of carbohydrate storage.* Plants store carbohydrates in leaf and stem  
626 tissues in the form of starch (leaf and stem) and sucrose (stem) in a pattern where the rates of  
627 storage may be modeled by a sine wave with a period of 24 hours [31,41]. The calculations for  
628 defining the necessary parameters, parameters  $S_{la}$ ,  $S_{sa1}$ ,  $S_{sa2}$ ,  $S_{lf}$ ,  $S_{sf1}$ ,  $S_{sf2}$ ,  $S_{lx}$ ,  $S_{sx1}$ , and  $S_{sx2}$  in  
629 equations (16) through (18), of the fit sine waves (see Supplemental Files 5 and 22).

630

631 *Enforcing logical flow of water.* The flow of water in the p-ath780 model is constrained as similar  
632 to that of micronutrients and are defined in equations (19) through (22), but without the  
633 equivalents of equations (6) and (8), and with the addition of a transpiration constraint. This  
634 difference is because oxidative phosphorylation in tissues creates water. Hence, in tissues  
635 without significant photosynthetic activity, water might be produced in this model, and the  
636 largest usage to which plants put water, to maintain turgor pressure, is not modeled as SMs use  
637 gDW as a basis of calculation, rather than fresh weight (see Supplemental File 22).

638

639 Defining the relationship between tissue growth rates. To avoid the aforementioned problem of  
640 having p-ath780 produce only the “cheapest” biomass, the growth rates of all four tissues have  
641 been linked by a series of constraints which ensure that they grow at rates which maintain the  
642 desired tissue mass ratios. The rate of biomass production determined by a SM is the exponential  
643 growth rate of the biological system being modeled [8]; therefore, plant mass can be defined as:

644

$$M_{tiss,n+1} = M_{tiss,n} e^{v_{tiss} growth,n t} \quad \forall tis \in [leaf, root, seed, stem] \quad (35)$$

645

646 Where  $M$  has been defined as the plant mass at time  $n + 1$ ,  $v_{plant\ growth,n}$  is defined as the rate  
647 of plant growth at time  $n$ , and  $M_{n-1}$  is defined as the plant mass at time  $n$ . Further, the ratio of  
648 the masses to two tissues can be defined with reference to a single tissue, such as leaf, in the  
649 following manner:

650

$$M_{tiss,n} = \frac{x_{tis}}{x_{leaf}} M_{leaf,n} \quad \forall tis \in [leaf, root, seed, stem] \quad (36)$$

651

652 By having substituted the former equation into the latter and simplifying the result (see  
653 Supplemental File 22), linear equations have been written to constrain biomass production rates  
654 of root, seed, and stem tissues with respect to leaf tissue as follows:

655

$$v_{tiss,n} = \ln \left( \frac{x_{tis,n+1} M_{leaf,n}}{x_{leaf,n+1} M_{tis,n}} \right) + v_{leaf,n} \quad \forall tis \in [root, seed, stem] \quad (37)$$

656

657 This constraint we have added to the SM model, as equations (23) through (28) in order to ensure  
658 that all tissues do have biomass production (or loss) and that it is in an amount which will result  
659 in tissue masses in the correct proportions.

660

661 *Ensuring non-productive loss of seed mass in silique shattering.* A constraint has been found  
662 necessary to enforce that metabolites associated with the loss of seed biomass, modeled by the  
663 biomass production constraint having reversed flow, when seeds are being lost during silique  
664 shattering (in the Silique Ripening Stage) and are not recycled into other parts of plant  
665 metabolism. This constraint just does that by forcing recovered metabolites into the biomass loss  
666 reaction of the seed tissue.

667

668 *Defining model maintenance and senescence costs.* An important consideration in any SM is  
669 the definition of a maintenance cost, which is typically defined as ATP hydrolysis [26]. Biomass-  
670 based maintenance and senescence costs have been defined as they have been suggested as more  
671 accurate or applicable for plant systems [36,42], but have not yet been used in an SM. We have  
672 defined maintenance and senescence costs as a biomass drain on each tissue scaled by tissue  
673 mass in equation (30). A maintenance cost value of  $k_m=0.03 \text{ day}^{-1}$  has been defined which is in



674 an order of magnitude typical for plant systems [42], and the same value has been defined for  
675 plant senescence,  $k_s$ , as this parameter appears to generally be of the same order of magnitude  
676 [36,42]. These rates are then converted into their per hour equivalent and scaled by tissue mass to  
677 enforce these constraints. Only a single constraint has been defined for both phenomena as both  
678 are biomass drains whose effect is additive. Literature evidence, including pictorial evidence of  
679 plant phenotype at various growth stages, appears to suggest that the rate of plant senescence  
680 increases drastically as the flowering production stage finishes and the Silique Ripening phases  
681 begin (in literature, growth stage 0.65 to 9.70) [24]. Further, it appears that the plant no longer  
682 maintains current mass, but allows tissues to die and desiccate [24]. This has been included in the  
683 p-ath780 model in that plant senescence is increased by two orders of magnitude and plant  
684 maintenance is set to zero following the end of the Flower Production stage. This results in a  
685 growth curve in-line with *in vivo* evidence (see Table 1).

686

687 *Other constraints enforced on the FBA-like optimization framework.* There are other constraints  
688 enforced on the optimization framework discussed above that are more difficult or cumbersome  
689 to state mathematically and are therefore discussed here.

690

691 *Defining the usage of seed stores by the seedling.* A seedling's source of carbon is primarily its  
692 reserves of stored carbohydrates, proteins, and lipids. Namely, it has been shown that seeds have  
693 stores of approximately 0.425  $\mu\text{g}$  of sucrose, 6  $\mu\text{g}$  of fatty acids, and 6  $\mu\text{g}$  of proteins (modeled  
694 here as component amino acids) available [30]. As no information concerning the pattern of  
695 usage of the seed storage has been found, it has been assumed that the stores are utilized at a  
696 constant rate during the duration of the seed germination period and that all the storage is fully

697 consumed by 88.5 hours after germination, which has been defined the point at which the  
698 cotyledons are fully open and leaf development intensifies [24]. The rate at which the seedling  
699 should have uptaken the seed storage has been determined by identifying the moles (mmol) of  
700 each major component of the seed storage and dividing by the time over which the seedling  
701 consumes those. This has resulted in a mmol/h quantity. See Supplemental File 5 for this  
702 calculation. This quantity has then been scaled by plant mass to result in a mmol/gDW□h  
703 quantity, which is used to bound the uptake rates of seed store metabolites. As the leaf has  
704 proven the most metabolically active tissue, it is assumed that the leaf tissue of an arabidopsis  
705 seedling uptakes the stored fatty acids, amino acids, and carbohydrates which is provided for  
706 seedling growth during the Seed Germination stage when the leaves have no access to light (see  
707 Figure 1, Seed Germination).

708  
709 *Defining initial plant and tissue ratios.* As the model advances plant and tissue masses with  
710 respect to time, the establishment of initial mass for plant and tissues has become important in  
711 this framework. Experimental evidence has shown that arabidopsis seeds have a fresh weight  
712 (FW) of 25.3  $\mu\text{g}$  and have only about 7% water content [30]. The embryo itself is assumed equal  
713 to the seed mass less the mass of seed stores of sucrose (0.425  $\mu\text{g}$ ), Fatty Acids (6  $\mu\text{g}$ ), and  
714 proteins (6  $\mu\text{g}$ ) [30]. Having assumed that the dry matter content ratio holds for the embryo as  
715 well, this has left approximately 11.0  $\mu\text{g}$  dry weight (DW) for the embryo. As information on the  
716 ratio of tissue masses in arabidopsis has not been documented in literature, the general ratio for  
717 herbaceous plants has been used as a starting point, namely 0.46:0.24:0.3 leaf:root:stem FW [32].  
718 This ratio has been converted to DW ratio for stoichiometric modeling. Experimental data has  
719 shown that the dry matter content of leaf tissue is 0.212 DW/FW, of root tissue is 0.170 DW/FW,

720 and of the stem tissue is 0.176 DW/FW [44]. Having converted the FW ratios to DW ratios has  
721 given the ratio of 0.511:0.267:0.211 leaf:root:stem DW. While the dry matter content of an  
722 embryonic arabidopsis is much higher than that of a mature plant (the source of the utilized dry  
723 matter content ratios), this DW tissue ratio has non-the-less been assumed to be accurate for the  
724 embryo due to lack of evidence to the contrary.

725

726 *Defining stage times.* Time points which define the transition between different stages of growth  
727 have been taken from a single source of experimental evidence [24]. Stage transitions selected  
728 include the transition to stage 0.70 (Seed Germination to Leaf Development transition in Figure  
729 3), stage 6.00 (Leaf Development to Flower Production transition in Figure 3), and stage 8.00  
730 (Flower Production to Silique Ripening transition in Figure 3). Not all lifecycle stage transitions  
731 for which there is experimental evidence have been incorporated into this model. In some cases,  
732 this has been due to a lack of metabolic relevance, such as the transition from stage 1.04 to stage  
733 1.05 where the plant transitions from 4 rosette leaves to 5 rosette leaves that are greater than  
734 1mm in length. This has not been important to the p-ath780 model as a ratio of plant mass to leaf  
735 surface area ratio is used instead [33] (see Supplemental File 5). Others cannot be modeled by  
736 the current framework tissues such as stage 5.10 which is when the first flower bud is visible  
737 [24], as the current p-ath780 model has no flower bud tissue. The length of the seed ripening  
738 stage is also determined by experimental evidence [24].

739

740 Defining the change in tissue mass ratios with growth stage. Using available literature evidence,  
741 two endpoints for the plant tissue mass ratios have been defined when no seeds are present and  
742 all seeds are produced [24,38]. The transition between these states are assumed to be linear with

743 respect to a parameter called seeding, defined above as  $s$ . These relationships are then modeled  
744 as:

745

$$x_{leaf} = c_{leaf} * seeding + x_{leaf,0} \quad (38)$$

$$x_{root} = c_{root} * seeding + x_{root,0} \quad (39)$$

$$x_{seed} = c_{seed} * seeding + x_{seed,0} \quad (40)$$

$$x_{stem} = c_{stem} * seeding + x_{stem,0} \quad (41)$$

$$c_{leaf} = -0.2514; c_{root} = -0.02862; c_{seed} = 0.2030; c_{stem} = 0.07698$$

$$x_{leaf,0} = 0.511; x_{root,0} = 0.267; x_{seed,0} = 0; x_{stem,0} = 0.211$$

746

747 Where  $x_{tissue}$  has been defined as the tissue mass fraction with respect to the total mass of the  
748 plant,  $c_{tissue}$  is defined as the change in tissue mass fraction with respect to seeding, and  $x_{tissue}$   
749 is defined as the initial mass fraction of each tissue. The gain in the seeding parameter has been  
750 assumed to be linear with time and is fit to experimental time point describing the fraction of  
751 flowers produced [24] (see Supplemental Files 5 and 22).

752

753 *Defining the availability of light.* The amount of light available to the model to use for  
754 photosynthesis has been defined initially by literature sources used for other constraints [31], and  
755 scaled by the transmittance of that light source (fluorescent lights) [34] and the absorbance of  
756 arabidopsis leaves [34] and surface area to plant mass of arabidopsis leaves [33] to define the  
757 amount of light usable by the plant system, which has been approximately estimated to be 4.00  
758 mmol/gDW plant·h. This value has been shown to be 21.50% of the total photons output by the  
759 fluorescent light (see Supplemental Files 5 and 22).

760

761

762 *Defining the FVA for the p-ath780 model.* A Flux Variability Analysis (FVA) model has been  
763 defined for growth both in light and dark growth. All flux bounds and constraints are the same  
764 and the FBA models, but the objective function is defined as:

765

$$\text{maximize/minimize } z = \gamma_j v_j \quad (42)$$

766

767 Where the FVA model solution has been iterated for each reaction  $j$ , and  $\gamma_j$  has been valued at 1  
768 for the current reaction whose maximum and minimum are to be investigated and 0 for all others  
769 and is stepped through first maximizing and then minimizing each reaction. Due to restrictions of  
770 the time allowed for model solutions, nine points has been selected at which to perform FVA.  
771 These points are 70 hours after germination (HAG, seed germination stage, dark), 408 HAG (leaf  
772 development stage, light), 576 HAG (leaf development stage, light), 590 HAG (leaf development  
773 stage, dark), 800 HAG (flower production stage, light), 810 HAG (flower production stage,  
774 dark), 1156 HAG (flower production to silique ripening transition), 1200 HAG (silique ripening  
775 stage, light), and 1220 HAG (silique ripening stage, dark).

776

777 *Defining the mass step between time points.* Using the biomass production rates calculated by  
778 the FBA-like optimization framework, a Constrained Non-linear System (CNS) of equations can  
779 be defined to advance the plant mass by treating the growth rates as constants. This system of  
780 equations has been derived from the basic principles of FBA (e.g. that growth rates are  
781 exponential rates of growth) through a sequence of simplifications and assumptions which can be

782 found in Supplemental File 22, and therefore will not be elaborated on here. The end result is  
 783 shown below for a given time point  $t$ .

784

$$\frac{dM_{plant}}{dt} \Big|_{n \rightarrow n+1/3} = \frac{e^{v_{leaf,bio}} M_{leaf,n}}{x_{leaf,n}} \left[ x_{leaf,n} v_{leaf,bio,n} + \frac{d}{dt} (v_{leaf,bio,n}) + \xi(t) \right] \quad (43)$$

$$\begin{aligned} \xi(t) = & x_{root} \psi(t) + x_{seed} \pi(t) + x_{stem} \kappa(t) + x_{leaf} (\psi(t) \zeta(t) + \pi(t) \rho(t) + \kappa(t) \iota(t)) \frac{d}{dt}(s) \\ & + x_{root} \frac{d}{dt} (\ln(\mu(t))) + x_{seed} \frac{d}{dt} (\ln(\theta(t))) + x_{stem} \frac{d}{dt} (\ln(\lambda(t))) \end{aligned} \quad (44)$$

$$\psi(t) = \ln(\mu(t)) + v_{leaf,bio,n} \quad (45)$$

$$\pi(t) = \ln(\theta(t)) + v_{leaf,bio,n} \quad (46)$$

$$\kappa(t) = \ln(\lambda(t)) + v_{leaf,bio,n} \quad (47)$$

$$\zeta = \frac{c_{root}(c_{leaf}S + x_{leaf,n}) - c_{leaf}(c_{root}S + x_{root,n})}{c_{leaf}^2 S^2 + 2c_{leaf}Sx_{leaf,n} + x_{leaf,n}^2} \quad (48)$$

$$\rho = \frac{c_{seed}(c_{leaf}S + x_{leaf,n}) - c_{leaf}(c_{seed}S)}{c_{leaf}^2 S^2 + 2c_{leaf}Sx_{leaf,n} + x_{leaf,n}^2} \quad (49)$$

$$\iota = \frac{c_{stem}(c_{leaf}S + x_{leaf,n}) - c_{leaf}(c_{stem}S + x_{stem,n})}{c_{leaf}^2 S^2 + 2c_{leaf}Sx_{leaf,n} + x_{leaf,n}^2} \quad (50)$$

$$\frac{d}{dt} (v_{leaf\ growth,n}) = \frac{3v_{leaf\ growth,n} - 4v_{leaf\ growth,n-1/3} + v_{leaf\ growth,n-2/3}}{2 \left[ \frac{1}{3} h \right]} \quad (51)$$

785

786 Where,  $\mu$ ,  $\theta$ ,  $\lambda$  are parameters defined in equations (24), (26), and (28), The above system of nine  
 787 equations has nine corresponding variables: the mass step [LHS of equation (43)],  $\xi$ ,  $\psi$ ,  $\pi$ ,  $\zeta$ ,  $\rho$ ,  $\iota$ ,  
 788 and the time derivative of the leaf growth rate [LHS of equation (53)].

789 Equation (51), as shown above, comes from a backwards finite difference formula of error order  
 790  $h^2$ . For the purposes of increased model accuracy and stability, the FBA-like framework is solved

791 every  $\frac{1}{3}$  of an hour to more accurately calculate the mass step at each hour (error is  
 792 approximately one ninth of that when using full hour values as estimates). As equation (51) is an  
 793 estimate (rather than an exact equation), should CNS not find a feasible solution, it is further  
 794 relaxed using a tolerance parameter (*tol*) to a pair of inequalities:

795

$$\begin{aligned} & \left| \frac{d}{dt}(v_{leaf\ growth,n}) \right| \\ & \geq (1 - tol) \left| \frac{3v_{leaf\ growth,n} - 4v_{leaf\ growth,n-1/3} + v_{leaf\ growth,n-2/3}}{2 \left[ \frac{1}{3} h \right]} \right| \quad (52) \\ & + o\left(\left[\frac{1}{3} h\right]^2\right) \end{aligned}$$

$$\begin{aligned} & \left| \frac{d}{dt}(v_{leaf\ growth,n}) \right| \\ & \leq (1 + tol) \left| \frac{3v_{leaf\ growth,n} - 4v_{leaf\ growth,n-\frac{1}{3}} + v_{leaf\ growth,n-\frac{2}{3}}}{2 \left[ \frac{1}{3} h \right]} \right| \quad (53) \\ & + o\left(\left[\frac{1}{3} h\right]^2\right) \end{aligned}$$

796

797 Where, *tol* begins at 0.00 and increases by 0.10 for each iteration if a solution is not found. This  
 798 results in an mixed-integer non-linear programming (MINLP) problem (8 equality constraints  
 799 and 9 variables), and the BARON solver has been used to attempt to solve the model. In all cases  
 800 where a solution has not been found via a CNS solver, a solution has been found using the  
 801 MINLP solver at *tol* = 0.10. The above set of equations [either equations (43) through (51) as a  
 802 CNS problem or (43) through (50), (52), and (53)] is solved three times to make estimates of the

803 LHS of equation (42) usable in Heunn's rule for explicit third-order Runge-Kutta method. For  
804 why this method has been used (see Supplemental File 22).

805

$$\left. \frac{dM_{plant}}{dt} \right|_{n \rightarrow n+1/3} = k_1 \quad (54)$$

$$\left. \frac{dM_{plant}}{dt} \right|_{n^{1/3} \rightarrow n^{2/3}} = k_2 \quad (55)$$

$$\left. \frac{dM_{plant}}{dt} \right|_{n^{2/3} \rightarrow n+1} = k_3 \quad (56)$$

806

807 After each partial step, the plant and tissues masses are updated for the next solution. These mass  
808 step estimates are then combined using Heunn's rule for explicit third-order Runge-Kutta  
809 method, where the new mass is calculated as follows.

810

$$M_{plant,n+1} = M_{plant,n} + h \left( \frac{1}{4}k_1 + \frac{3}{4}k_3 \right) \quad (57)$$

811

812 And the mass of each individual tissue is then updated as follows:

813

$$M_{leaf,n+1} = x_{leaf,n+1} M_{plant,n+1} \quad (58)$$

$$M_{root,n+1} = x_{root,n+1} M_{plant,n+1} \quad (59)$$

$$M_{seed,n+1} = x_{seed,n+1} M_{plant,n+1} \quad (60)$$

$$M_{stem,n+1} = x_{stem,n+1} M_{plant,n+1} \quad (61)$$

814



815 Why p-ath780 updates overall plant mass rather than solving the above problem for each  
816 individual tissue is discussed in Supplemental File 22.

817

818 **Software platforms used.** See Supplemental file 23 for which programming language various  
819 supplemental files utilize. For Python code, version 3.3 is used; for Perl, version 5.26 for  
820 Supplemental Files 18 through 21 and Strawberry Perl version 5.24.0.1 is used for Supplemental  
821 File 8; GAMS code utilizes version 24.7.4. All GAMS and Python code, in addition code  
822 included in Supplemental File 8 is run using the Holland Computing Center at the University of  
823 Nebraska, Lincoln. Supplemental Files 18 through 21 utilize the additional module the LWP (the  
824 world-wide web library for Perl) module 6.39, and have been run on a windows desktop  
825 computer.

826

827 **Code availability.** The authors declare that the code supporting the findings of this study is  
828 available within the article's Supplementary Information files.

829

830 **Abbreviations used.** For the convenience of our readers, a list of abbreviations used is given  
831 below:

832 GPR: Gene-Protein-Reaction

833 SM: Stoichiometric Model

834 FBA: Flux Balance Analysis

835 FVA: Flux Variability Analysis

836 LP: Linear Problem

837 CNS: Constrained Non-linear System

- 838 MINLP: Mixed Integer Non-Linear Problem
- 839 arabidopsis: *Arabidopsis thaliana*
- 840 LHS: Left-Hand Side
- 841 wrt: with respect to
- 842 gDW: grams Dry Weight
- 843 DW: Dry Weight
- 844 gFW: grams Fresh Weight
- 845 FW: Fresh Weight
- 846 MFA: Metabolic Flux Analysis
- 847 KEGG: Kyoto Encyclopedia of Genes and Genomes
- 848 DAG: Days After Germination
- 849 HAG: Hours After Germination

850

851 **Acknowledgement.** This work has been completed utilizing the Holland Computing Center of  
852 the University of Nebraska, which receives support from the Nebraska Research Initiative. The  
853 authors gratefully acknowledge funding from UNL Faculty Startup Grant 21-1106-4038.

854

855 **Author contributions.** Experiments have been conceived by R.S. and W.L.S. W.L.S. performed  
856 the experiments and analyzed the data. R.S. and W.L.S. contributed analysis tools. R.S. and  
857 W.L.S. wrote the manuscript.

858

859 **Supplementary information** is provided. To help readers navigate the extensive set of included  
860 data and replicate this study, Supplemental File 23 provides an overview of the included  
861 supplemental files and lays out the file structure to use in conjunction with the p-ath780 model.

862

863 **Conflict of interest:** The authors declare no conflicts of interest.

864 **References**

- 865 1. Beyer P, Al-Babili S, Ye X, Lucca P, Schaub P, Welsch R, et al. Golden rice: introducing the  
866  $\beta$  carotene biosynthesis pathway into rice endosperm by genetic engineering to defeat  
867 vitamin A deficiency. *J Nutr.* 2002;132:506S-510S.
- 868 2. Hall RD, Brouwer ID, Fitzgerald MA. Plant metabolomics and its potential application for  
869 human nutrition. *Physiol Plant.* 2008;132(2):162-175.
- 870 3. Gonzali S, Mazzucato A, Perata P. Purple as a tomato: towards high anthocyanin tomatoes.  
871 *Trends Plant Sci.* 2009;14(5):237-241.
- 872 4. Paddon CJ, Keasling Semi-synthetic artemisinin: a model for the use of synthetic biology in  
873 pharmaceutical development. *Nat Rev Microbiol.* 2014;12(5):355–367.
- 874 5. Hilder VA, Boulter D. Genetic engineering of crop plants for insect resistance - a critical  
875 review. *Crop Prot.* 1999;18(3):177–191.
- 876 6. Chen THH, Murata N. Enhancement of tolerance of abiotic stress by metabolic engineering  
877 of betaines and other compatible solutes. *Curr Opin Plant Biol.* 2002;5(3):250–257.
- 878 7. Srinivasan S, Cluett WR, Mahadevan R. Constructing kinetic models of metabolism at  
879 genome-scales: A review. *Biotechnol J.* 2015;1359:1345–1359.
- 880 8. Orth JD, Thiele I, Palsson BØ. What is flux balance analysis? *Nat Biotechnol.*  
881 2010;28(3):245–248.
- 882 9. Burgard AP, Pharkya P, Maranas CD. OptKnock: a bilevel programming framework for  
883 identifying gene knockout strategies for microbial strain optimization. *Biotechnol Bioeng.*  
884 2003;84(6):647–657.
- 885 10. Ranganathan S, Suthers PF, Maranas CD. OptForce: An optimization procedure for  
886 identifying all genetic manipulations leading to targeted overproductions. *PLoS Comput Biol*

- 887 2010;6(4):1-11.
88811. Mahadevan R, Edwards JS, Francis DJ. Dynamic flux balance analysis of diaxic growth in  
889 *Escherichia coli*. *Biophys J*. 2002;83(3):1331–1340.
89012. Saha R, Liu D, Hoynes-O’Connor A, Liberton M, Yu J, Bhattacharyya-Pakrasi M, et al.  
891 Diurnal regulation of cellular processes in the *Cyanobacterium* *synechocystis* sp. strain PCC  
892 6803: insights from transcriptomic, fluxomic and physiological analyses. *MBio*. 2016;7(3):1–  
893 14.
89413. Ng CY, Jung M, Lee J, Oh M-K. Production of 2,3-butanediol in *Saccharomyces cerevisiae*  
895 by in silico aided metabolic engineering. *Microb Cell Fact*. 2012;11(68):1-14.
89614. Poolman MG, Miguet L, Sweetlove LJ, Fell DA. A genome-scale metabolic model of  
897 *Arabidopsis* and some of its properties. *Plant Physiol*. 2009;151(3):1570–81.
89815. Gomes de Oliveira Dal’Molin C, Quek LE, Palfreyman RW, Brumbley SM, Nielsen LK.  
899 AraGEM, a genome-scale reconstruction of the primary metabolic network in *Arabidopsis*.  
900 *Plant Physiol*. 2010;152:579–589.
90116. Gomes de Oliveira Dal’Molin C, Quek LE, Saa PA, Nielsen LK. A multi-tissue genome-  
902 scale metabolic modeling framework for the analysis of whole plant systems. *Front Plant Sci*.  
903 2015;6(4):1–12.
90417. Grafahrend-Belau E, Junker A, Eschenröder A, Müller J, Schreiber F, Junker B. Multiscale  
905 metabolic modeling: dynamic flux balance analysis on a whole-plant scale. *Plant Physiol*.  
906 2013;163(2):637–647.
90718. Saha R, Suthers PF, Maranas CD. *Zea mays* iRS1563: a comprehensive genome-scale  
908 metabolic reconstruction of maize metabolism. *PLoS One*. 2011;6(7):1-12.
90919. Gomes de Oliveira Dal’Molin C, Quek LE, Palfreyman RW, Brumbley SM, Nielsen LK.

- 910 C4GEM, a genome-scale metabolic model to study C4 plant metabolism. *Plant Physiol.*  
911 2010;154(4):1871–1885.
- 912 20. Poolman MG, Kundu S, Shaw R, Fell DA. Responses to light intensity in a genome-scale  
913 model of rice metabolism. *Plant Physiol.* 2013;162(2):1060–1072.
- 914 21. Mintz-Oron S, Meir S, Malitsky S, Ruppin E, Ahoroni A, Shlomi T. Reconstruction of  
915 *Arabidopsis* metabolic network models accounting for subcellular compartmentalization and  
916 tissue-specificity. *Proc Natl Acad Sci.* 2012;109(1):339–344.
- 917 22. Simons M, Saha R, Guillard L, Clément G, Armengaud P, Cañas R, et al. Nitrogen-use  
918 efficiency in maize (*Zea mays* L.): from “omics” studies to metabolic modelling. *J Exp Bot.*  
919 2014;65(19):5657–5671.
- 920 23. Grafahrend-Belau E, Schreiber F, Koschutzki D, Junker BH. Flux balance analysis of barley  
921 seeds: a computational approach to study systemic properties of central metabolism. *Plant*  
922 *Physiol.* 2009;149(1):585–598.
- 923 24. Boyes DC, Zayed AM, Ascenzi R, McCaskill AJ, Hoffman NE, Davis KR, et al. Growth  
924 stage-based phenotypic analysis of *Arabidopsis*: a model for high throughput functional  
925 genomics in plants. *Plant Cell.* 2001;13:1499–1510.
- 926 25. Zomorodi AR, Maranas CD. OptCom: A multi-level optimization framework for the  
927 metabolic modeling and analysis of microbial communities. *PLoS Comput Biol* 2012;8(2):1–  
928 13.
- 929 26. Thiele I, Palsson BØ. A protocol for generating a high-quality genome-scale metabolic  
930 reconstruction. *Nat Protoc.* 2010;5(1):93–121.

- 931 27. Lonien J, Schwender J. Analysis of metabolic flux phenotypes for two Arabidopsis mutants  
932 with severe impairment in seed storage lipid synthesis. *Plant Physiol.* 2009;151(3):1617–  
933 1634.
- 934 28. Johnson JMF, Barbour NW, Weyers SL. Chemical composition of crop biomass impacts its  
935 decomposition. *Soil Sci Soc Am J.* 2007;71(1):155-162.
- 936 29. Thiele I, Gudmundsson S. Computationally efficient flux variability analysis. *BMC*  
937 *Bioninformatics.* 2010;11(489):1-3.
- 938 30. Tomaz T, Bagard M, Pracharoenwattana I, Lindén P, Lee CP, Carroll AJ, et al.  
939 Mitochondrial malate dehydrogenase lowers leaf respiration and alters photorespiration and  
940 plant growth in Arabidopsis. *Plant Physiol.* 2010;154(3):1143–1157.
- 941 31. Hendrik Poorte A, Nagel O. The role of biomass allocation in the growth response of plants  
942 to different levels of light, CO<sub>2</sub>, nutrients and water: a quantitative review. *Aust J Plant*  
943 *Physiol.* 2000;27(189):595–607.
- 944 32. Poorter H, Nagel O. The role of biomass allocations in the growth response of plants to  
945 different levels of light, CO<sub>2</sub>, nutrients and water: a quantitative review. *Aust J Plant Physiol.*  
946 2000;27:595-607.
- 947 33. Clauss MJ, Aarssen LW. Phenotypic plasticity of size-fecundity relationships in Arabidopsis  
948 thaliana. *J Ecol.* 1994;82(3):447–455.
- 949 34. Bläsing OE, Gibon Y, Günther M, Höhne M, Morcuende R, Osuna D, et al. Sugars and  
950 Circadian Regulation Make Major Contributions to the Global Regulation of Diurnal Gene  
951 Expression in Arabidopsis. *Plant Cell.* 2007;17:3257–3281.
- 952 35. Baleja R, Šumpich J, Bos P, Helštyňová B, Sokanský K, Novák T. Comparison of LED  
953 properties, compact fluorescent bulbs and bulbs in residential areas. *Proceedings of the 16th*

- 954 International Scientific Conference on Electrical Power Engeneering; 2015 May 20-22;  
955 Kouty nad Desnou, Czech Republic: IEEE, 2015.
- 956 36. Cannell MGR, Thornley JHM. Modelling the components of plant respiration: representation  
957 and realism. *Ann Bot.* 1999;85:55–67
- 958 37. Cannell MGR, Thornley JHM. Modelling the components of plant respiration: some guiding  
959 principles. *Ann Bot.* 1999;85:45–54.
- 960 38. Baud S, Boutin J, Miquel M, Lepiniec L, Rochat C. An integrated overview of seed  
961 development in *Arabidopsis thaliana* ecotype WS. *Plant Physiol Biochem* 2002;40:151–160.
- 962 39. Li B, Suzuki JI, Hara T. Latitudinal variation in plant size and relative growth rate in  
963 *Arabidopsis thaliana*. *Oecologia.* 1998;115:293–301.
- 964 40. Solovchenko AE, Merzlyak MN. Screening of visible and UV radiation as a photoprotective  
965 mechanism in plants. *Russ J Plant Physiol.* 2008;55(6):719–737.
- 966 41. Yazdanbakhsh N, Sulpice R, Graf A, Stitt M, Fisahn J. Circadian control of root elongation  
967 and C partitioning in *Arabidopsis thaliana*. *Plant, Cell Environ.* 2011;34(6):877–894.
- 968 42. Amthor JS. The role of maintenance respiration in plant growth. *Plant, Cell Environ.*  
969 1984;7(8):561–569.
- 970 43. McClung CR. Plant circadian rhythms. *The Plant Cell.* 2006;18:792-803.
- 971 44. Oakenfull RJ, Davis SJ. Shining a light on the *Arabidopsis* circandian clock. *Plant Cell*  
972 *Envirn.* 2017;40:2571-2585.

973

974



975 **Supporting Information Captions**

976 **Supplemental\_File\_1.txt:** This file is a text file (extension “.txt”) which contains the seed tissue  
977 model of p-ath780. This file is referenced as “p-ath780Seed.txt” by other supplemental files,  
978 particularly code, and this correct name should replace the default name for attached code to run  
979 properly.

980  
981 **Supplemental\_File\_2.txt:** This file is a text file which contains the leaf tissue model of p-  
982 ath780. This file is referenced as “p-ath780Leaf.txt” by other supplemental files, particularly  
983 code, and this correct name should replace the default name for attached code to run properly.

984  
985 **Supplemental\_File\_3.txt:** This file is a text file which contains the root tissue model of p-  
986 ath780. This file is referenced as “p-ath780Root.txt” by other supplemental files, particularly  
987 code, and this correct name should replace the default name for attached code to run properly.

988  
989 **Supplemental\_File\_4.txt:** This file is a text file which contains the stem tissue model of p-  
990 ath780. This file is referenced as “p-ath780Stem.txt” by other supplemental files, particularly  
991 code, and this correct name should replace the default name for attached code to run properly.

992  
993 **Supplemental\_File\_5.xlsx:** This file is a Microsoft Excel file which store a wide variety of  
994 information concerning the p-ath780 model. This include the manually-curated GPR results for  
995 each tissue model, the calculations pertaining to the determination of the biomass equation for  
996 each tissue model, calculations for various parameters used in the p-ath780 model to incorporate  
997 literature data, and calculations pertaining to the diurnal storage and uptake of carbohydrates.

998

999 **Supplemental\_File\_6.txt:** This file is the GAMS code for the p-ath780 model itself. It is  
1000 generally named “p-ath780.gms”.

1001

1002 **Supplemental\_File\_7.txt:** This is an executable Python code which takes the input of a model  
1003 (such as Supplemental Files 1 through 4) and outputs a number of files which can be read by  
1004 GAMS code. Generally, this code is named “convert.py”. This code requires slight modifications  
1005 depending on which model file is to be converted (see in-code comments).

1006

1007 **Supplemental\_File\_8.txt:** This is an executable Perl code which takes the results of converting  
1008 each tissue model file using Supplemental File 11 and creates some of the necessary inputs for  
1009 the p-ath780 GAMS code. This is generally referenced as “makeGrowthInputs.pl”.

1010

1011 **Supplemental\_File\_9.txt:** This is a text file which contains a list of the names of parameters  
1012 used to defined p-ath780 model growth. This is referred to by other files as  
1013 “growthSpecsNames.txt”.

1014

1015 **Supplemental\_File\_10.txt:** This is a text file which contains the actual specifications used for  
1016 growing by the p-ath780 model. This is referred to by other files as “growthSpecs.txt”,  
1017 importantly it is referred to as this by Supplemental File 6.

1018

1019 **Supplemental\_File\_11.txt:** This is a text file containing the list of time points to iterate over for  
1020 each day, e.g. this contains each hour of the day, beginning at 0 and ending at 23. This file is

1021 referenced by others as “timepointsH.txt”, importantly it is referred to as this by Supplemental  
1022 File 6.

1023

1024 **Supplemental\_File\_12.txt:** This is a text file containing a list of days to solve the model over, in  
1025 this case from day 0 to day 61. This file is referred to by others as “timepoints.txt”, importantly it  
1026 is referred to as this by Supplemental File 6.

1027

1028 **Supplemental\_File\_13.txt:** This is a text file containing a list of data labels for much of the data  
1029 saved at each time point (combination of day and hour) and reported on in the troubleshooting  
1030 file. This file is referred to by others as “timeData.txt”, importantly it is referred to as this by  
1031 Supplemental File 6.

1032

1033 **Supplemental\_File\_14.txt:** This is a text file which lists the time at which the sun rises (or light  
1034 is made available) each day. At present, light is made available at a default time of 0. This file is  
1035 referred to by others as “sunrise.txt”, importantly it is referred to as this by Supplemental File 6.

1036

1037 **Supplemental\_File\_15.txt:** This is a text file which lists the time at which the sun sets (or light  
1038 is no longer made available) each day. At present, light is made available at a default time of 0.  
1039 This file is referred to by others as “sunset.txt”, importantly it is referred to as this by  
1040 Supplemental File 6.

1041

1042 **Supplemental\_File\_16.txt:** This file basically converts the set time of day to a parameter of  
1043 equal value. Necessary because mathematical operations cannot be performed on sets. This file is

1044 referred to by other files as “timeofday.txt”, importantly it is referred to as this by Supplemental  
1045 File 6.

1046

1047 **Supplemental\_File\_17.xlsx:** This is a Microsoft Excel file which contains the results of the p-  
1048 ath780 model for various alternative objective functions. The sheet tabs indicate which  
1049 alternative objective function the data corresponds to. The key is as follows:

1050 lpe\_g\_g\_g\_X: linear photonic efficiency objective for the leaf, growth objective for other tissues.

1051 The number which replaces “X” indicates the run number.

1052 g\_g\_g\_g: Growth objective for all tissues.

1053 nlpe\_X: Non-linear photonic efficiency objective, the number which replaces the “X” denotes  
1054 the run number.

1055 g\_g\_fa\_g\_X: Fatty acid storage objective for the seed tissue, growth objective for all other, the  
1056 number which replaces the “X” denotes the run number.

1057

1058 **Supplemental\_File\_18.txt:** This is an executable Perl code file which is used to automatically  
1059 curate the Gene-Protein-Reaction (GPR) links for all tissue models using the KEGG API  
1060 (advanced programming interface, [rest.kegg.jp](http://rest.kegg.jp)). Inside the documentation of the code is the  
1061 instructions for adapting it to investigate the GPR links for each tissue. Generally, this file is  
1062 named “RxnstoGenes.pl”. This file requires the LWP Perl package.

1063

1064 **Supplemental\_File\_19.tex:** This file is a comma separated values file. This file contains a list of  
1065 73 KEGG pathways for which to get the list of associated reactions. This file is referred to by

1066 code as “.csv”, and must have the proper name for the code to function properly. Generally  
1067 referred to as “PathRxns.csv”.

1068

1069 **Supplemental\_File\_20.txt:** This file is an executable Perl code file (extension of “.pl”) which  
1070 automatically generates the lists of reactions associated with various KEGG pathways. The  
1071 KEGG pathways used are listed in Supplemental File 19. This file is generally named  
1072 “PathGetRxnsComps.pl”.

1073

1074 **Supplemental\_File\_21.txt:** This file is an executable Perl code file which is used to  
1075 automatically read the files created from Supplemental Files 7 to give counts of how many  
1076 reactions a model has which belong to each of the pathways indicated by Supplemental File 7.  
1077 Generally, this file is named “ModelPathComp.pl”.

1078

1079 **Supplemental\_File\_22.docx:** This file is a Microsoft Word file which contains all the  
1080 calculations simplifications, and rational used for the determination of the function for whole-  
1081 plant mass step with respect to time.

1082

1083 **Supplemental\_File\_23.docx:** A Microsoft Word file designed to help navigate other files  
1084 provided as well as to outline the general file structure and barebones workflow used with the p-  
1085 ath780 model to make model implementation easier.

1086

1087 **Table Legends**

1088 **Table 1:** This table compares the critical mass-based metrics which have been used for *in silico* to  
1089 *in vivo* data comparison across different objective functions for the p-ath780 model. The final  
1090 two columns are for metrics which have been targets of change when applying different  
1091 objective functions. The green row is the *in vivo* data ranges which have served as targets for *in*  
1092 *silico* model behavior. The blue row is the behavior of the p-ath780 model with the usual  
1093 objective function used in all other analyses (maximizing biomass production of all tissues). The  
1094 grey rows are alternate objective functions we have explored. The photonic efficiency objective  
1095 functions for the leaf tissue have caused lower fractions of available light used, while the fatty  
1096 acid production objective for the seed tissue has caused greater diversion of carbon resources  
1097 toward fatty acid production and storage. All alternative objective functions have resulted in  
1098 lower mass production *in silico*.

| Tissue-Level Objectives |                                            |                     | Total Plant Mass (mg) |      |             | Relative Growth Rate (RGR) | Peak Tissue Mass (mg) |              |                                      | Resource utilization or production (median %) |       |
|-------------------------|--------------------------------------------|---------------------|-----------------------|------|-------------|----------------------------|-----------------------|--------------|--------------------------------------|-----------------------------------------------|-------|
|                         |                                            |                     | Leaf                  | Seed | Root & Stem | 17 DAG                     | 24 DAG                | 31 DAG       | Whole-plant RGR (day <sup>-1</sup> ) | Leaf                                          | Stem  |
| <i>In vivo</i> data     | <i>In vivo</i> data                        | <i>In vivo</i> data | 0.5-2                 | 2-8  | 10-30       | 0.21 – 0.25                | 163.7<br>±52.0        | 188<br>±39.3 | 127.9<br>±52.7                       | ?                                             | ?     |
| Biomass production      | Biomass production                         | Biomass production  | 0.554                 | 3.74 | 25.2        | 0.246                      | 177                   | 189          | 130.                                 | 100%                                          | 0%    |
| Biomass production      | Fatty acid Storage<br>( $\beta = 1E - 6$ ) | Biomass production  | 0.554                 | 3.74 | 25.2        | 0.246                      | 177                   | 189          | 130.                                 | 100%                                          | 61.6% |
| Biomass production      | Fatty acid Storage<br>( $\beta = 2E - 2$ ) | Biomass production  | 0.554                 | 3.74 | 25.2        | 0.246                      | 94.1                  | 100.         | 68.9                                 | 100%                                          | 61.7% |
| Linear                  | Biomass                                    | Biomass             | 0.554                 | 3.74 | 25.2        | 0.246                      | 177                   | 189          | 130.                                 | 100%                                          | 0%    |

|                                                  |                                          |                    |       |      |      |       |     |     |      |      |       |  |
|--------------------------------------------------|------------------------------------------|--------------------|-------|------|------|-------|-----|-----|------|------|-------|--|
| photonic efficiency<br>$(\alpha = 25)$<br>Linear | production                               | production         |       |      |      |       |     |     |      |      |       |  |
| photonic efficiency<br>$(\alpha = 50)$<br>Linear | Biomass production                       | Biomass production | 0.554 | 3.74 | 25.2 | 0.246 | 177 | 189 | 130. | 100% | 0%    |  |
| Linear photonic efficiency<br>$(\alpha = 50)$    | Fatty acid Storage<br>$(\beta = 1E - 2)$ | Biomass production | 0.554 | 3.74 | 25.2 | 0.246 | 133 | 142 | 97.7 | 100% | 61.7% |  |

1099



# Workflow for calculations for a single "snapshot"

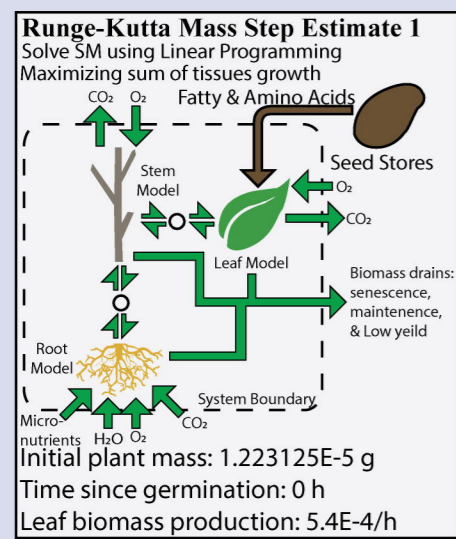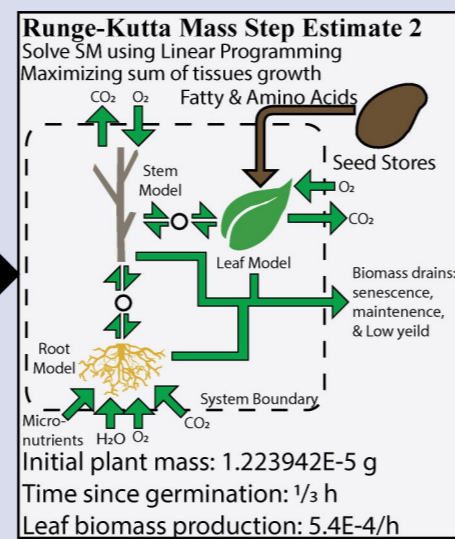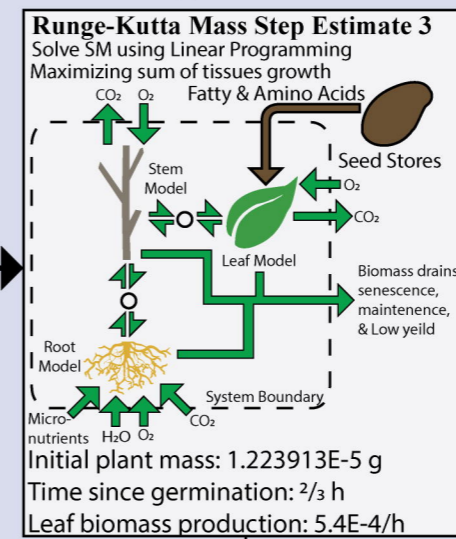

Determine mass step using Heunn's third order rule for Runge-Kutta method  
 Total mass step:  $h * (1/4 * k_1 + 0 * k_2 + 3/4 * k_3)$   
 Total mass step (1 hour): 3.79E-9 g C  
**Total mass step (1 hour): 9.46E-9 g (0.031%)**  
**Flux values equivalent to the optimal flux rates in Mass Step Estimate 1**

Combine step size estimate, plant mass, tissue masses, and step estimate 1 optimal flux rates into a "snapshot" of metabolism for hour 0 which is used to advance to hour 1

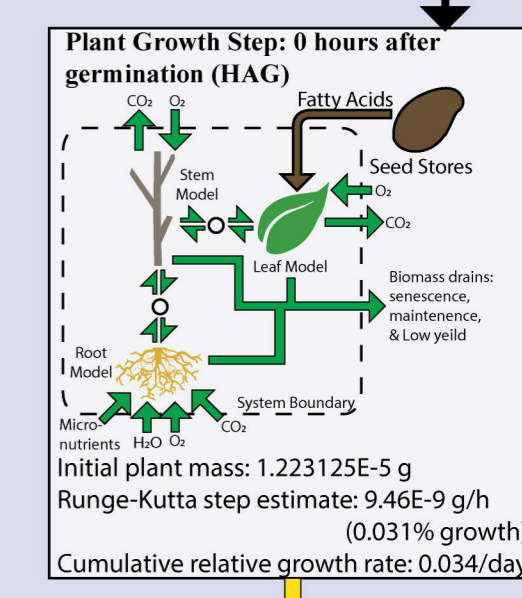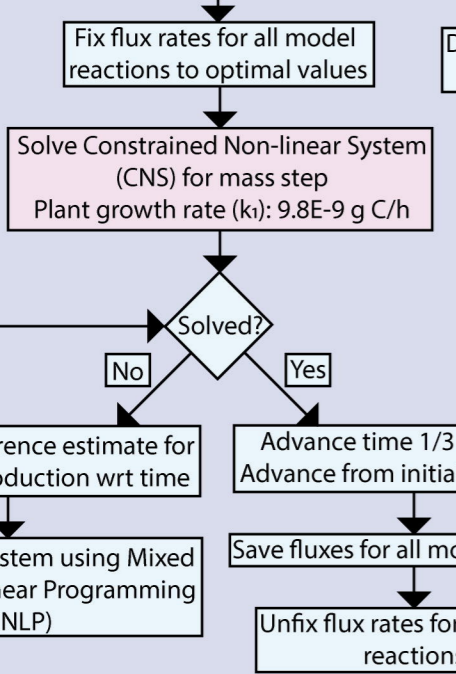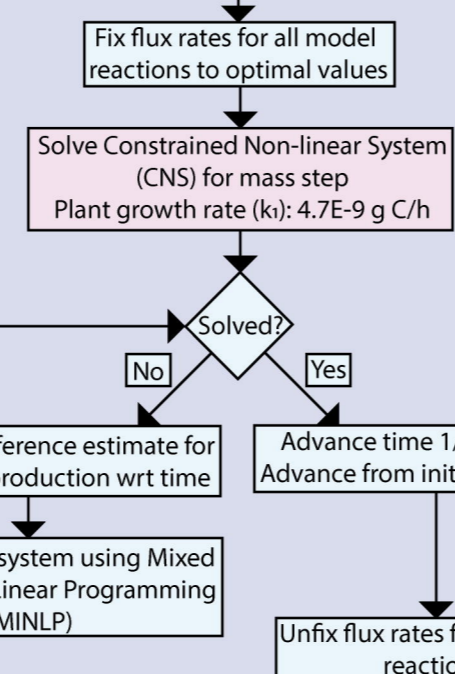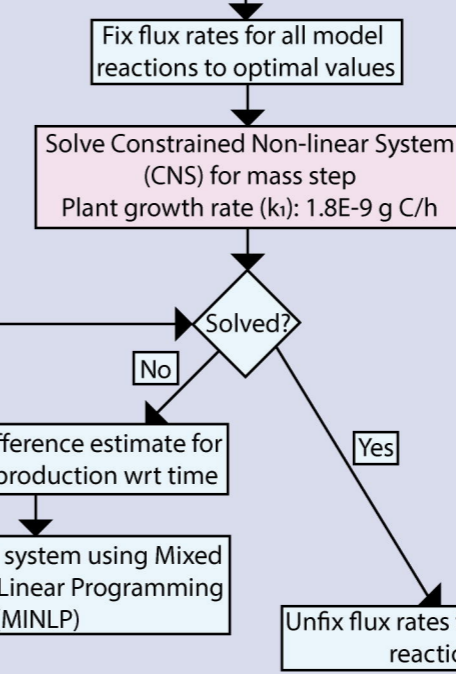

Repeat for each "snapshot", using "snapshot" data to advance one hour at a time

## Stringing together "snapshots" at each hour to model plant lifecycle

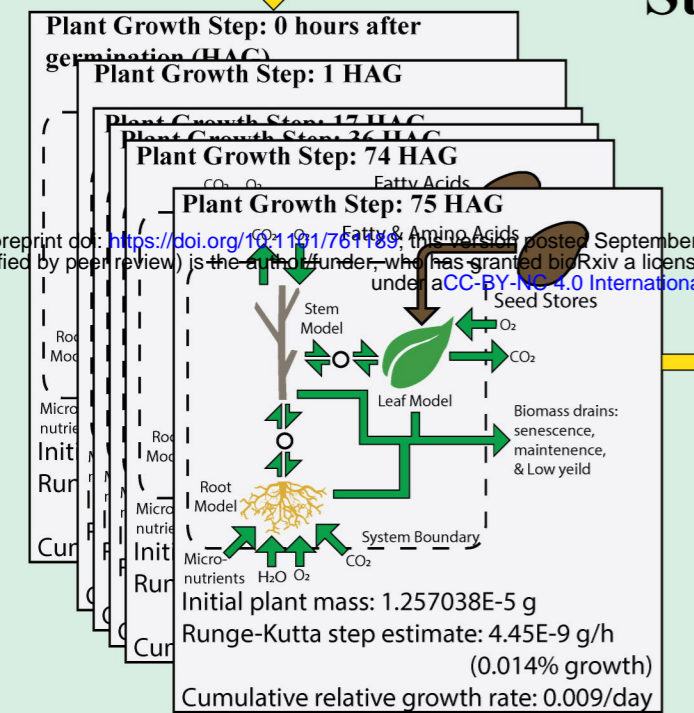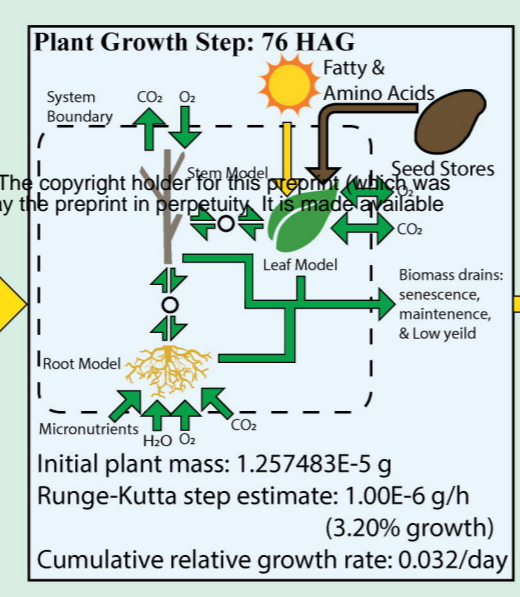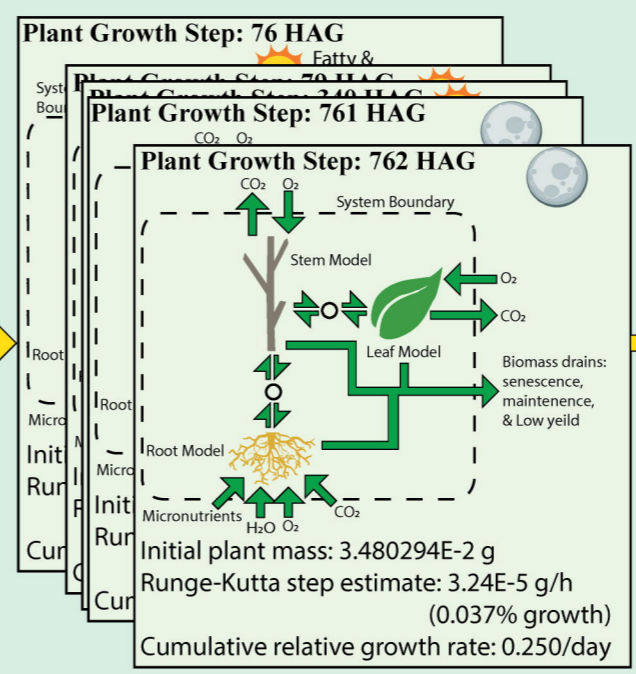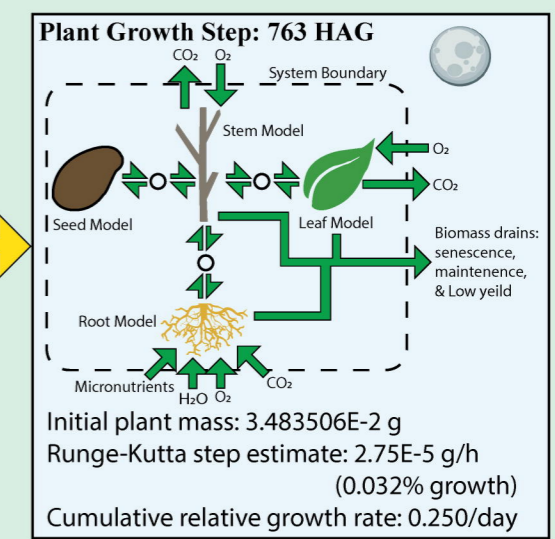

**Seed Germination Stage**  
**Time points 0 to 75 hours after germination (HAG)**  
 • Start with embryonic mass ( $1.22E-5$ )  
 • Constant tissue mass ratio (0.51:0.27:0:0.21 leaf:root:seed:stem)  
 • Cotyledon obscure leaves preventing photosynthesis  
 • Plant uptakes fatty acids from seed stores

**Seed Germination to Leaf Development Transition**  
**Time point 76 HAG**  
 • Constant tissue mass ratio (0.51:0.27:0:0.21 leaf:root:seed:stem)  
 • Cotyledon removed at 76.5 hours after germination

**Leaf Development Stage**  
**Time points 77 to 762 HAG**  
 • Constant tissue mass ratio (0.51:0.27:0:0.21 leaf:root:seed:stem)  
 • 12 hours light/12 hours darkness diurnal rhythm  
 • Plant stores starch and sucrose synthesized during light for consumption during night  
 • Seed stores exhausted at 88.5 HAG

**Leaf Development to Flower Production Transition**  
**Time point 763 HAG**  
 • Non-constant tissue mass ratio  
 • Seed tissue mass fraction increases, other tissues mass fraction decreases  
 • Seed mass first develops at 763.2 hours after germination

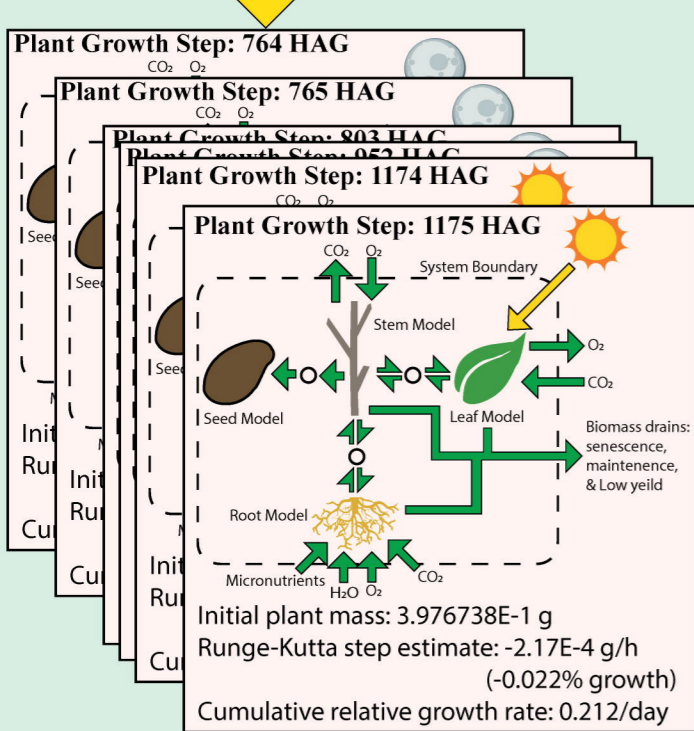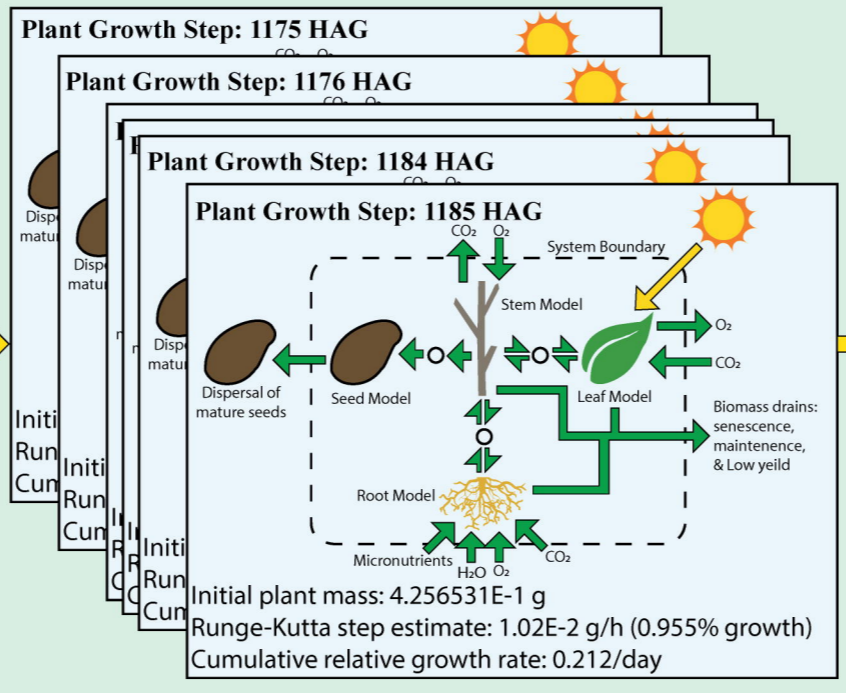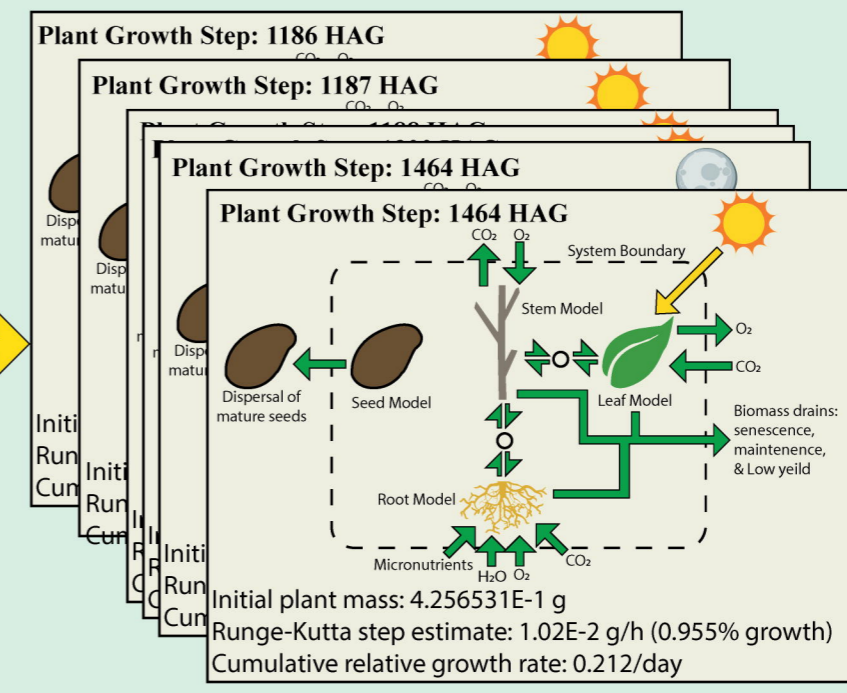

**Flower Production Stage**  
**Time points 764 to 1175 HAG**  
 • Non-constant tissue mass ratio  
 • 12 hours light/12 hours darkness diurnal rhythm  
 • Plant stores starch and sucrose synthesized during light for consumption during night  
 • Seed tissue mass fraction increases, other tissues mass fraction decreases  
 • Flowers are not modeled, rather modeled as directly producing seed tissue

**Flower Production to Silique Ripening Transition**  
**Time points 1176 to 1185 HAG**  
 • Non-constant tissue mass ratio, see equations (8) to (11)  
 • 12 hours light/12 hours darkness diurnal rhythm  
 • Plant stores starch and sucrose synthesized during light for consumption during night  
 • Seed tissue being produced (up to 1185.6 hours)  
 • Seed tissue being lost from the system

**Silique Ripening Stage**  
**Time points 1186 to 1464 HAG**  
 • Non-constant tissue mass ratio  
 • Seed tissue metabolically inactive and has no metabolic transactions with other tissues  
 • Seed tissue being lost from the system  
 • 12 hours light/12 hours darkness diurnal rhythm  
 • Plant stores starch and sucrose synthesized during light for consumption during night

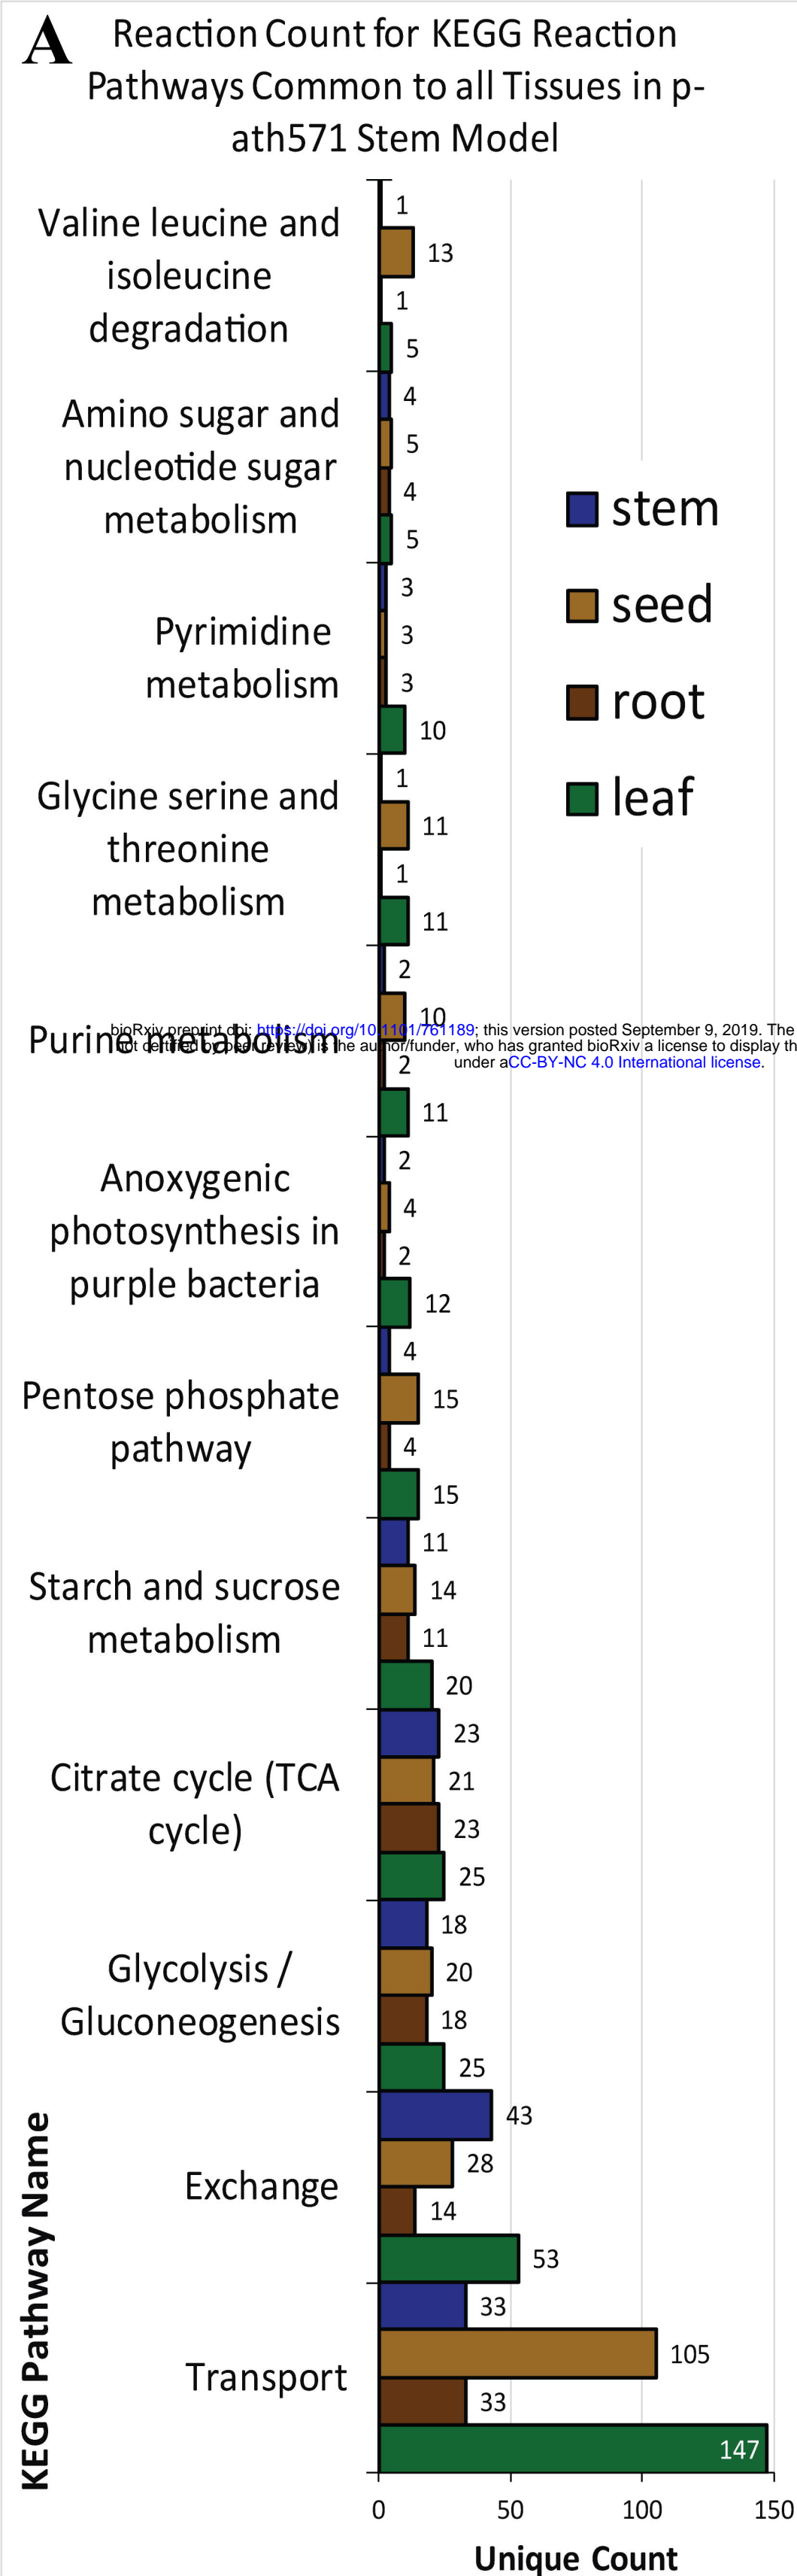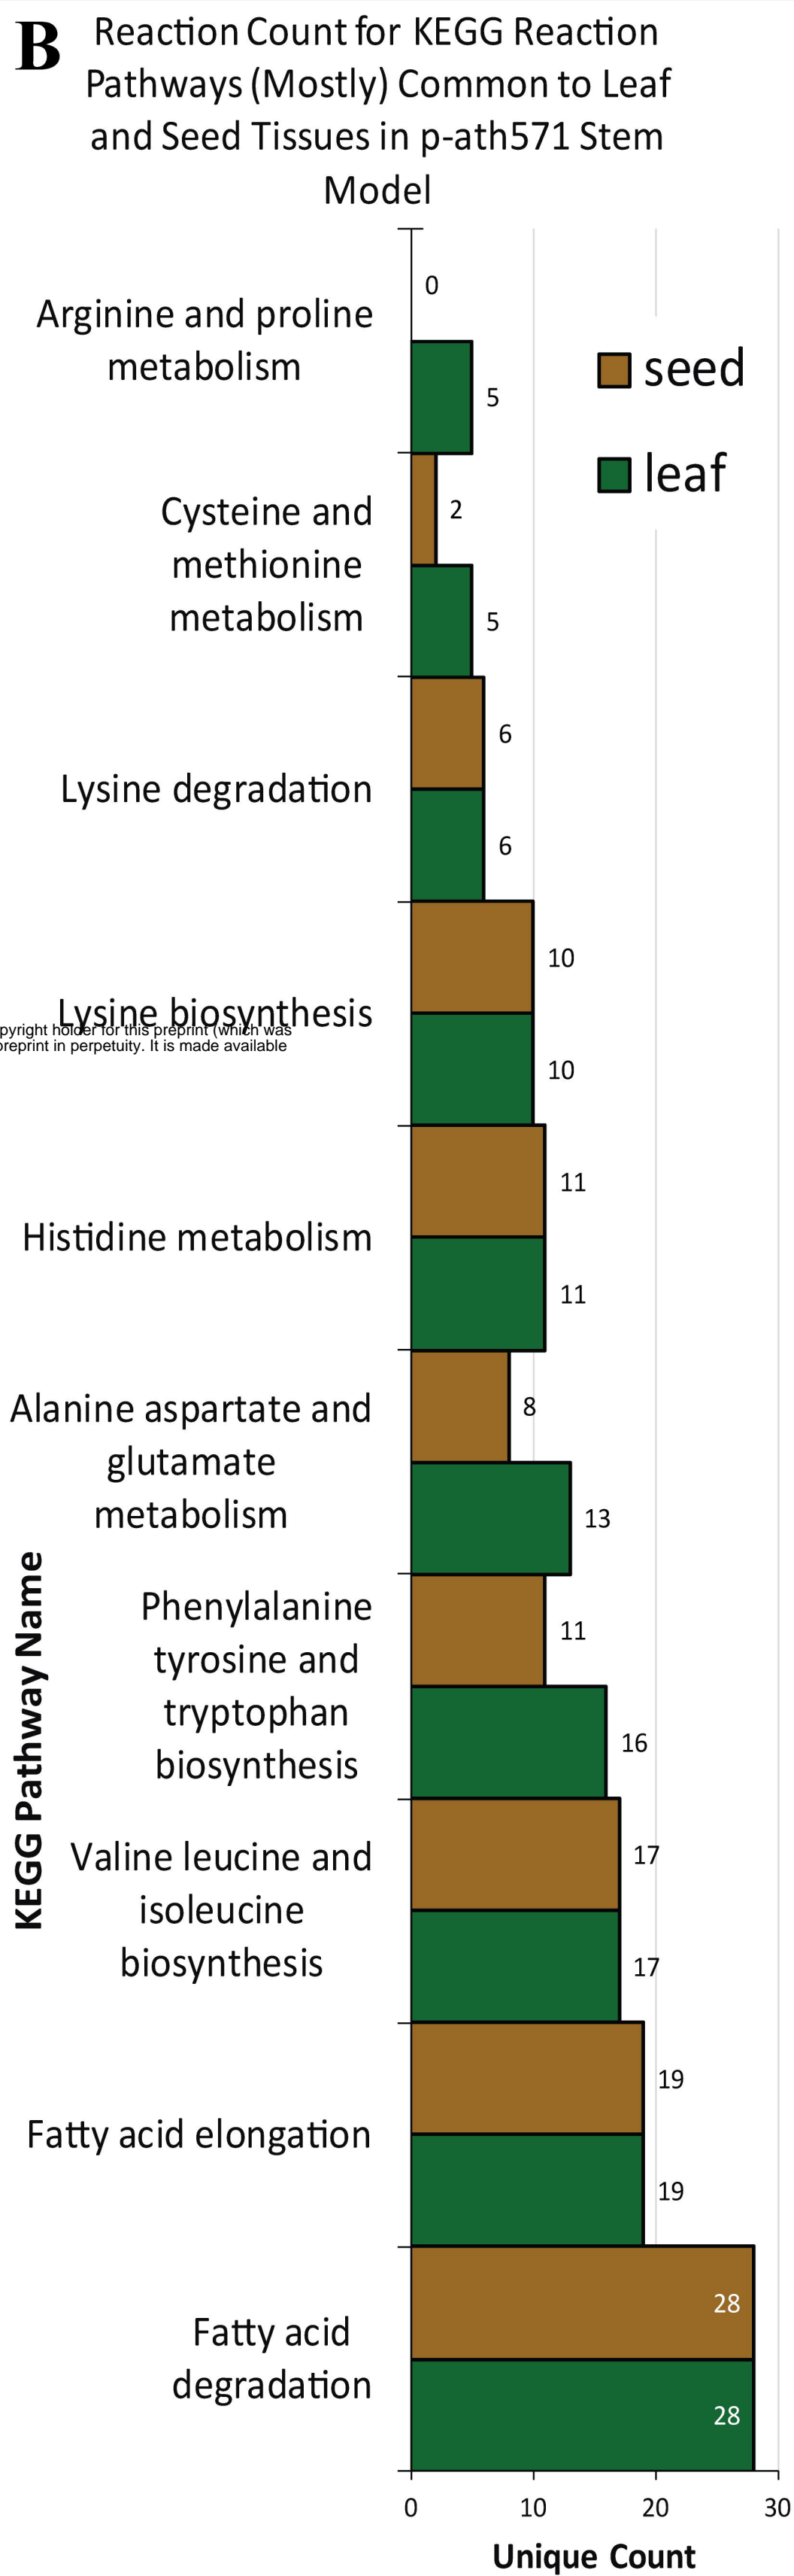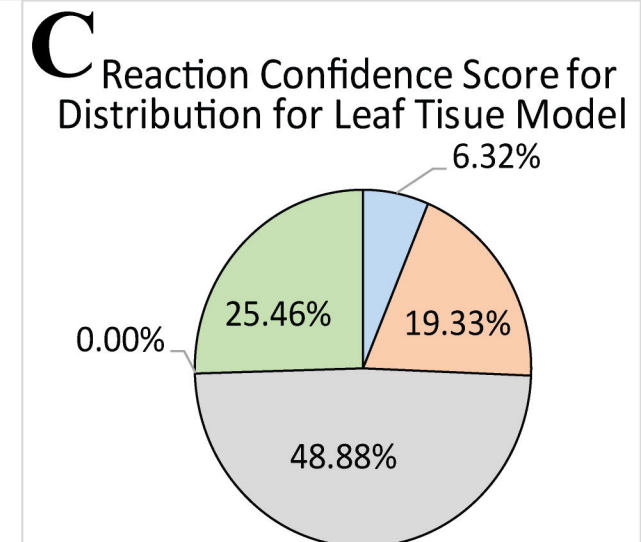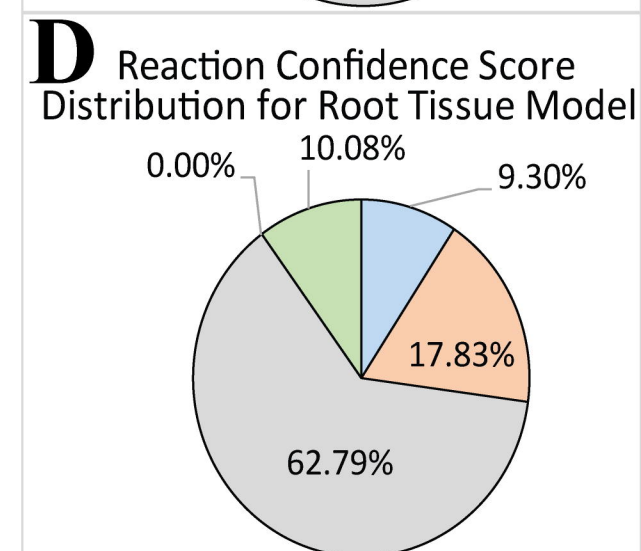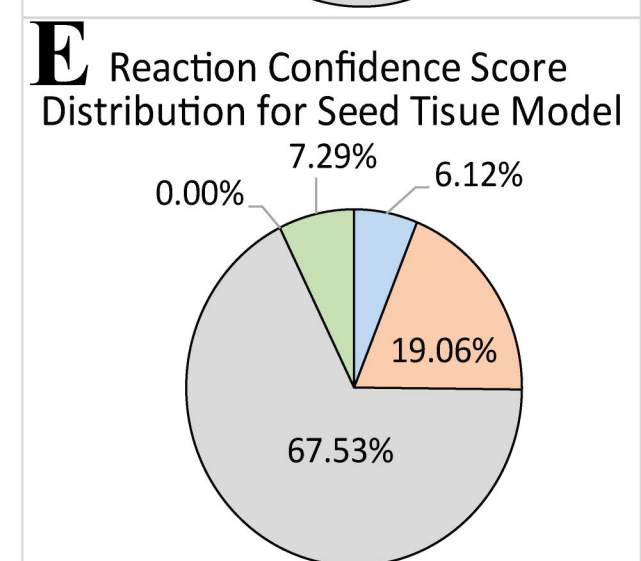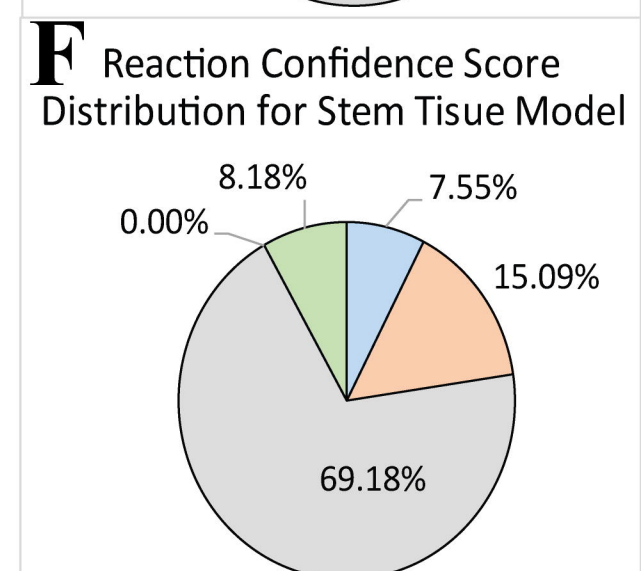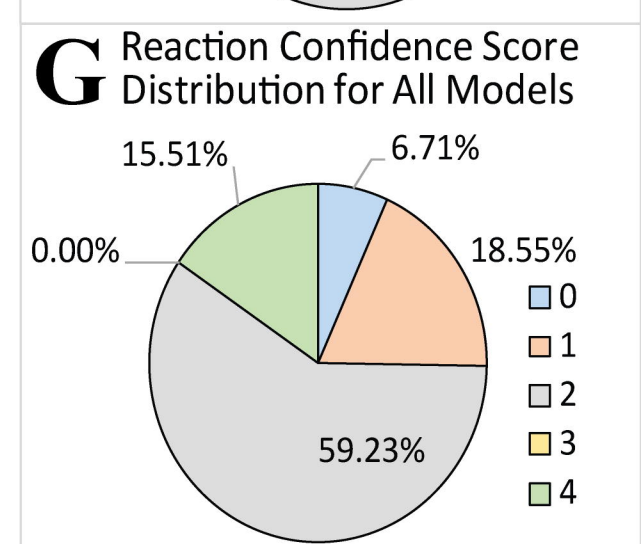

**Confidence Score Key (C-G) (Ordinal Scores)**

- 0: not evaluated.
- 1: Necessary for modeling.
- 2: genome annotation data or physiological data.
- 3: Knock-in/knock-out evidence of gene function.
- 4: Direct evidence for reaction.

# Core Network Model Construction Workflow

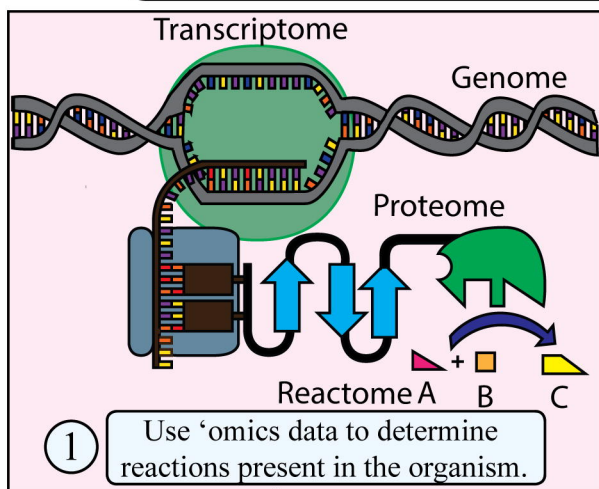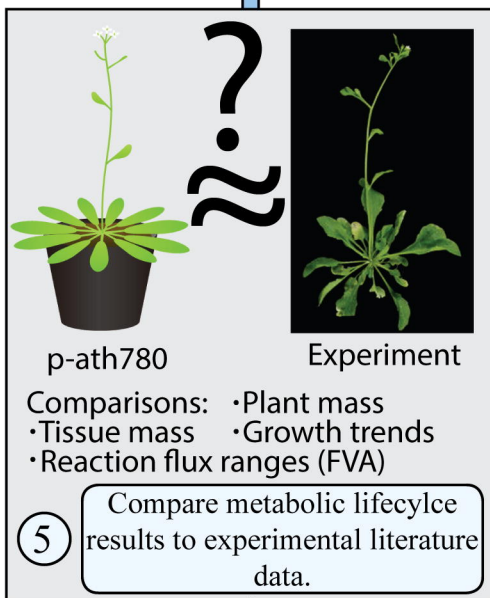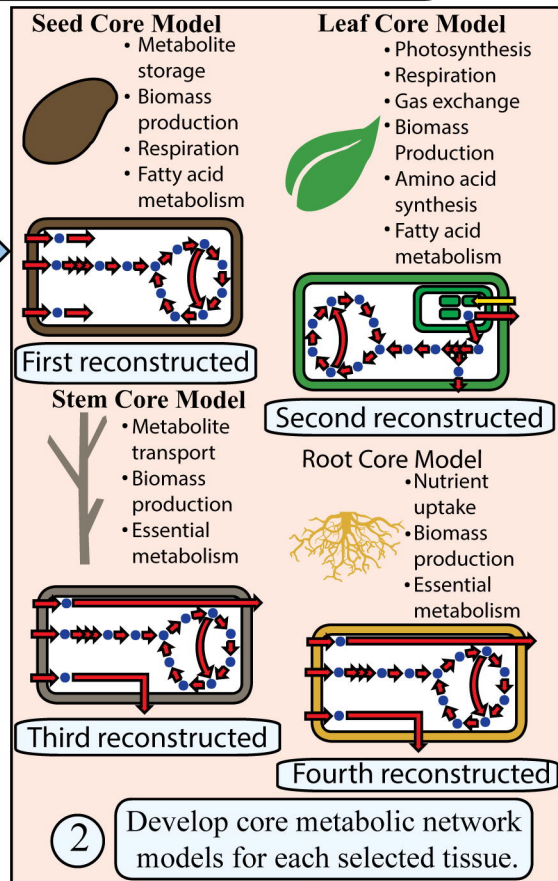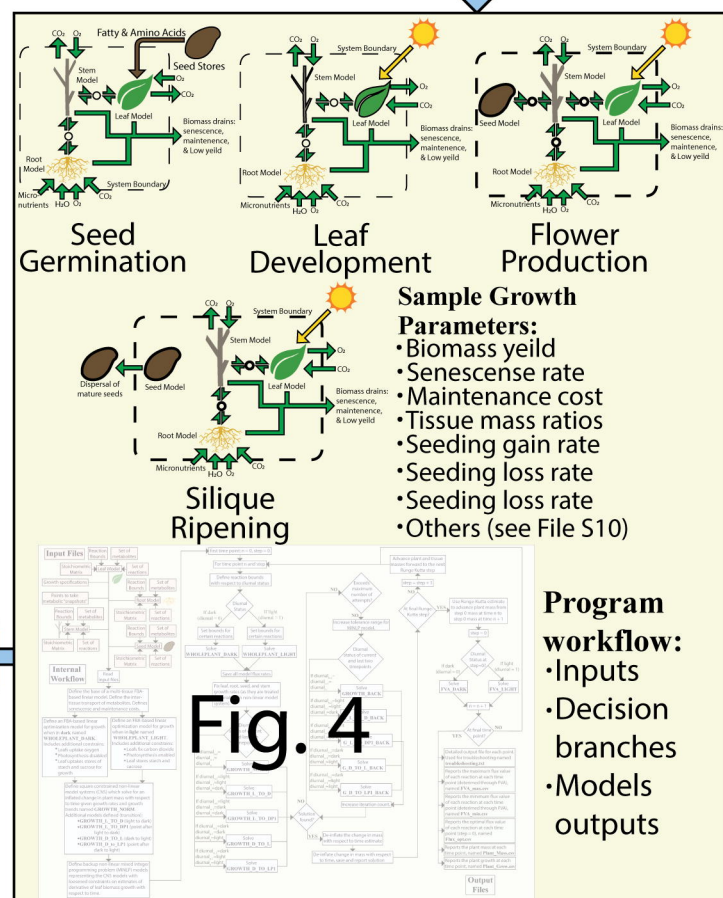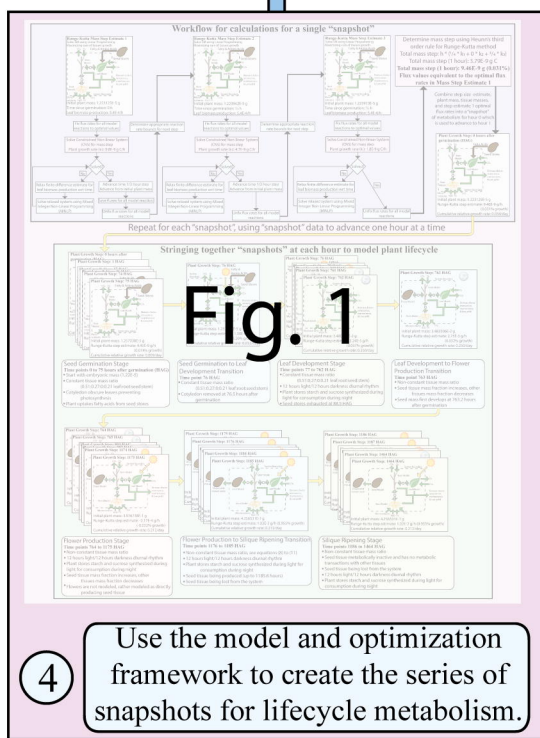

**Fig. 1**

**Fig. 4**

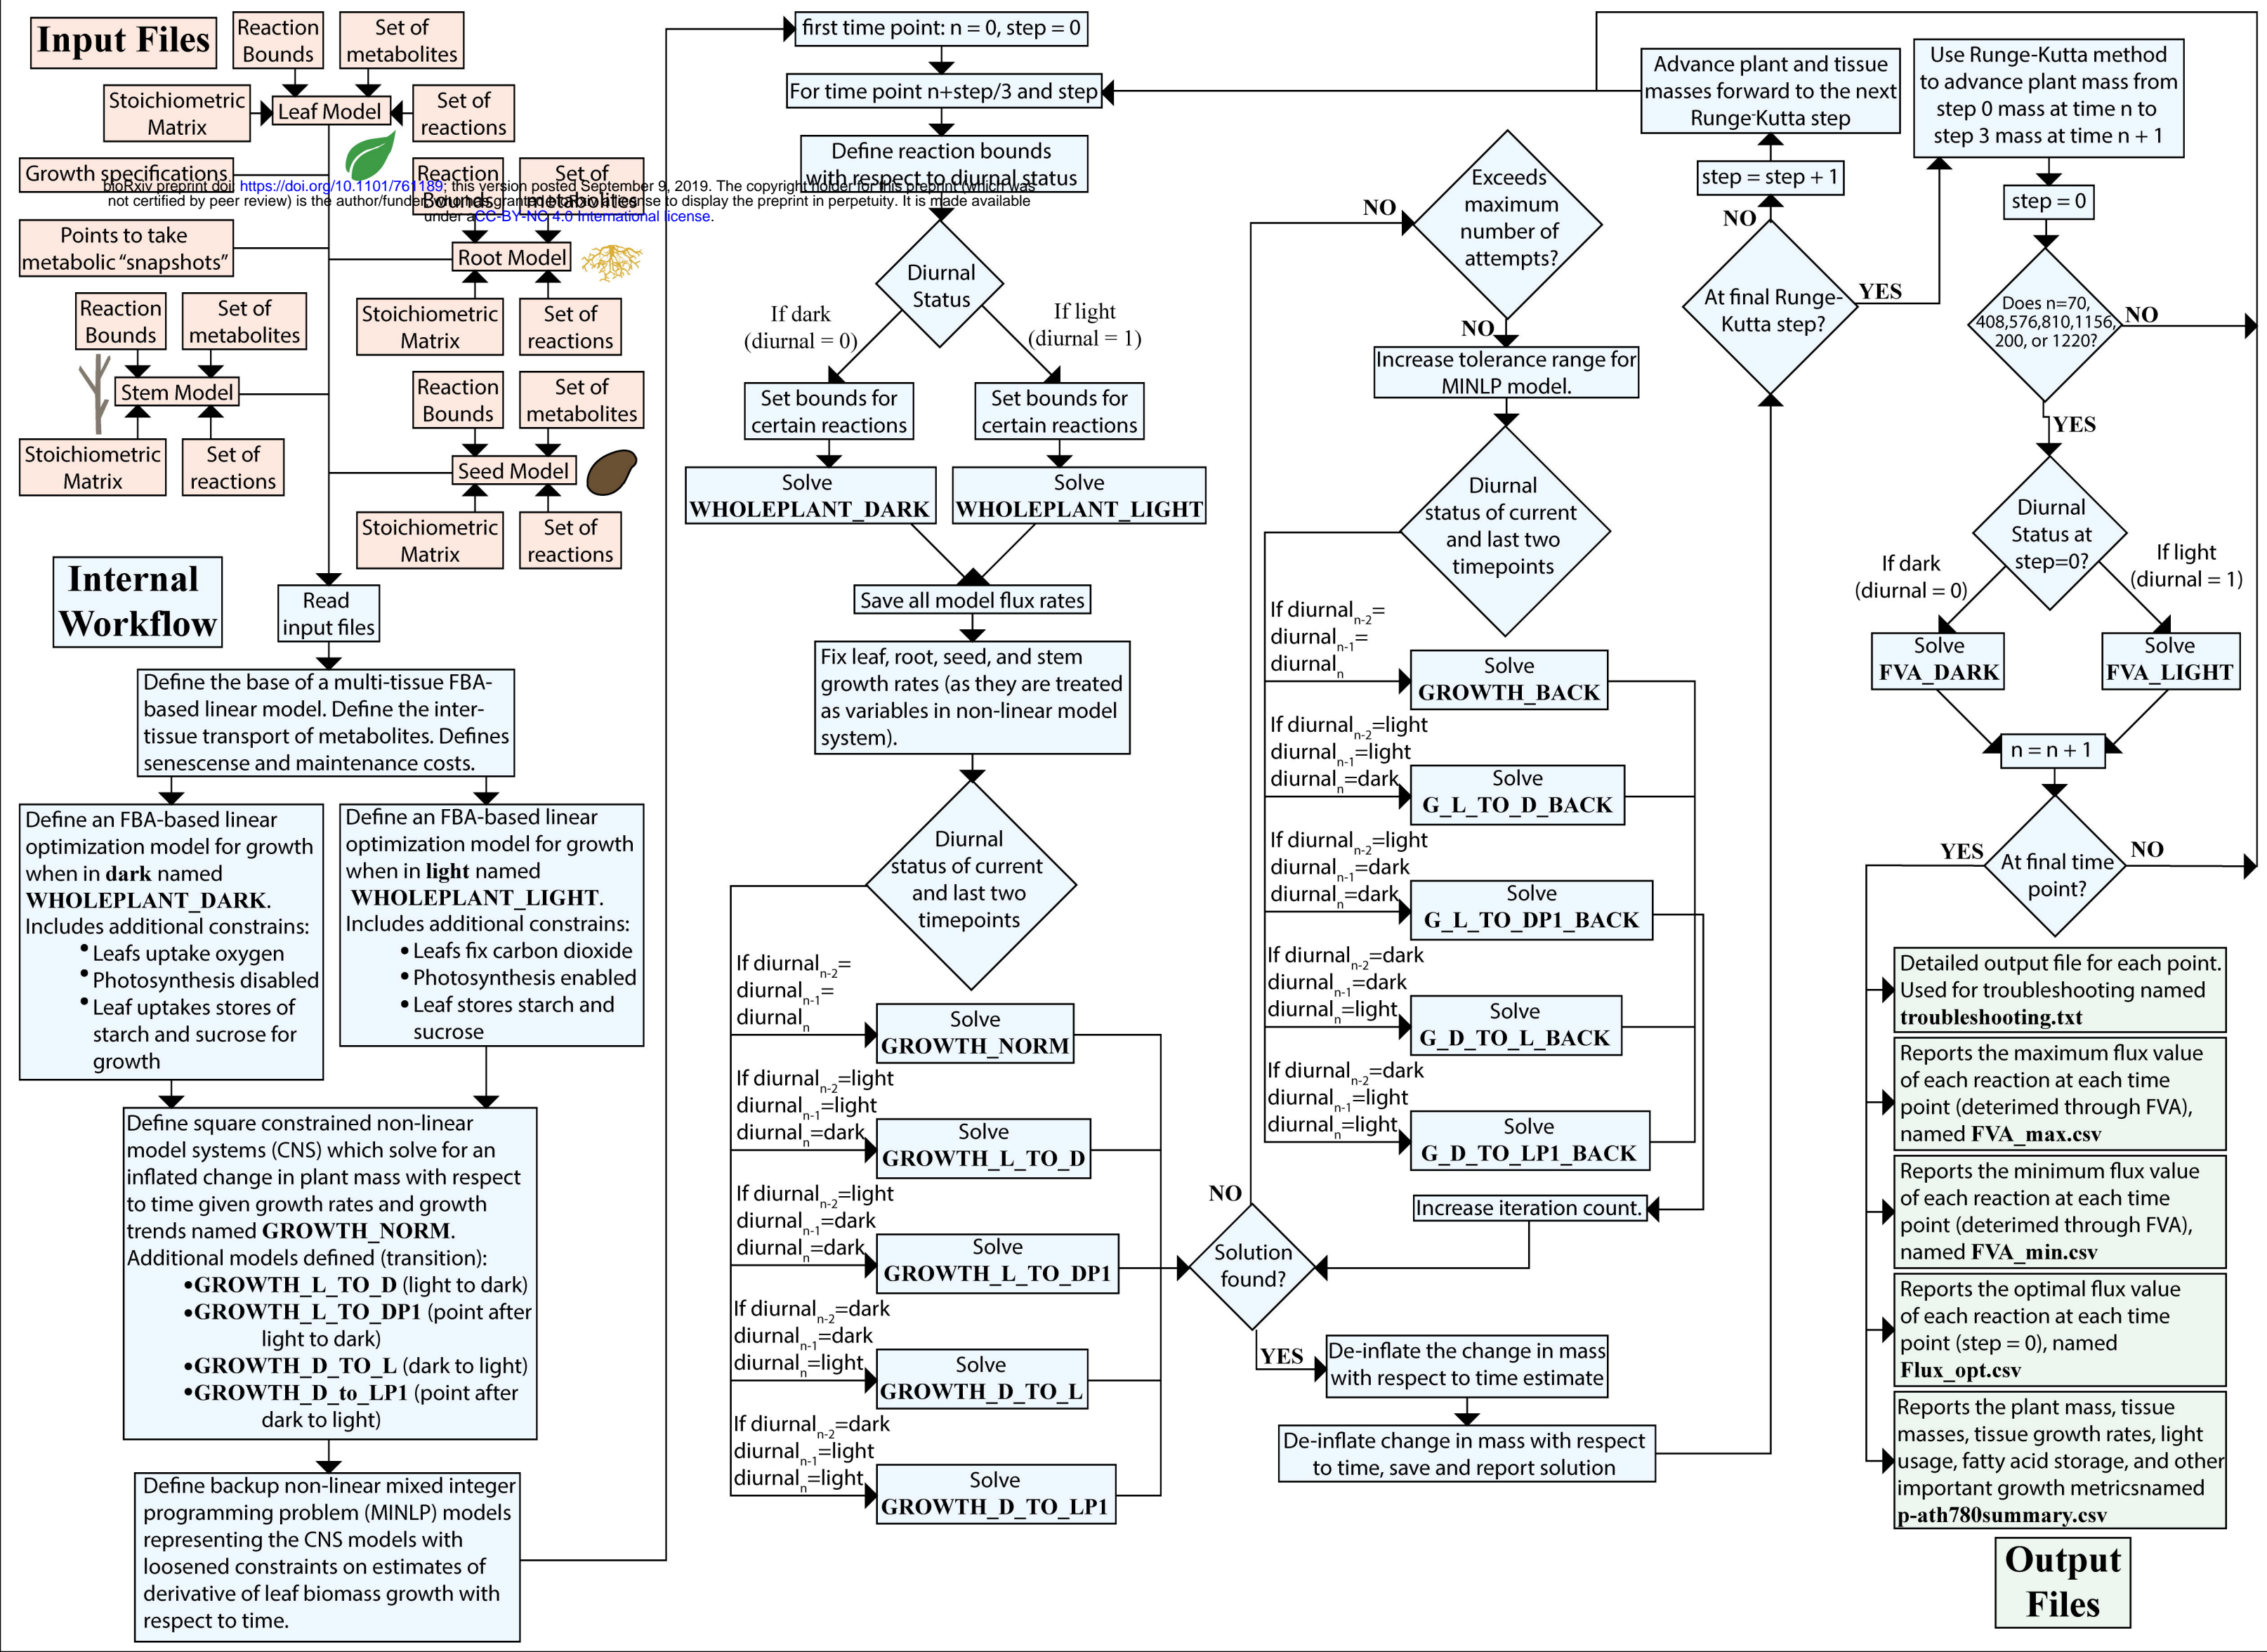

(A) Photonic efficiency objective function  $Z = -\alpha v_{\text{light}} + v_{\text{biomass,root}} + v_{\text{biomass,seed}} + v_{\text{biomass,stem}}$

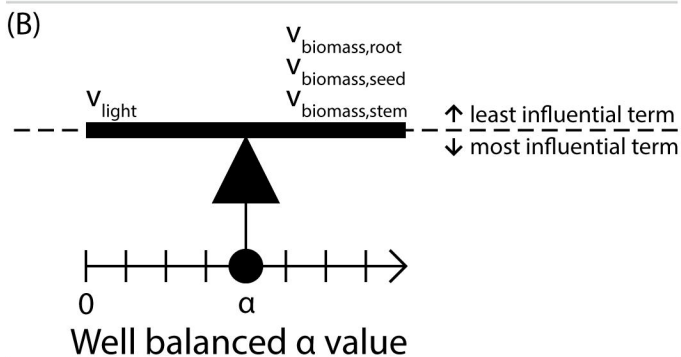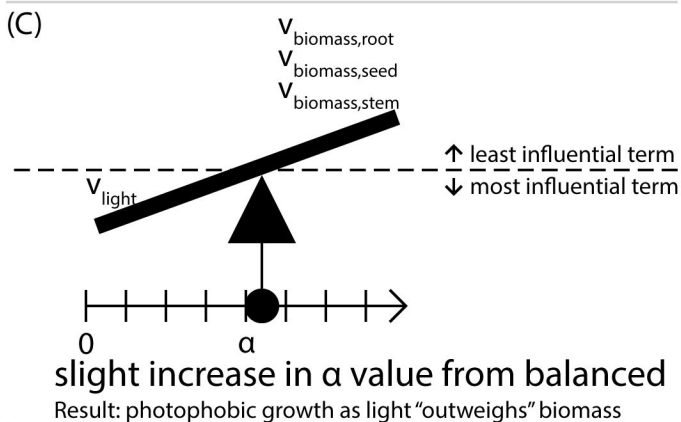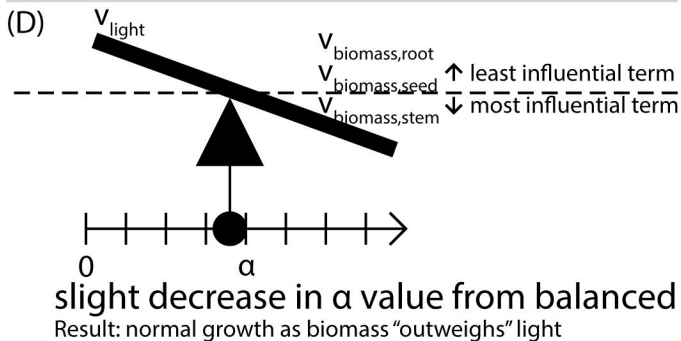

Source: https://www.biorxiv.org/content/10.1101/761189v2.full.pdf
